## **The Easter Egg Weevil (*Pachyrhynchus*) genome reveals synteny in Coleoptera across 200 million years of evolution**

Matthew H. Van Dam<sup>1,3,\*</sup>, Analyn Anzano Cabras<sup>2</sup>, James B. Henderson<sup>3</sup>, Cynthia Pérez Estrada<sup>4</sup>, Arina D. Omer<sup>4</sup>, Olga Dudchenko<sup>4</sup>, Erez Lieberman Aiden<sup>4</sup>, Athena W. Lam<sup>3</sup>

<sup>1</sup> *Entomology Department, Institute for Biodiversity Science and Sustainability, California Academy of Sciences, 55 Music Concourse Dr., San Francisco, CA 94118, USA*

<sup>2</sup> *Coleoptera Research Center, Institute for Biodiversity and Environment, University of Mindanao, Matina, Davao City, 8000, Philippines*

<sup>3</sup> *Center for Comparative Genomics, Institute for Biodiversity Science and Sustainability, California Academy of Sciences, 55 Music Concourse Dr., San Francisco, CA 94118, USA.*

<sup>4</sup> *The Center for Genome Architecture, Department of Molecular and Human Genetics, Baylor College of Medicine, Houston, TX 77030, USA*

\* *Correspondence to be sent to: Matthew H. Van Dam,  
E-mail: [matthewhvandam@gmail.com](mailto:matthewhvandam@gmail.com)*

1 **The Easter Egg Weevil (*Pachyrhynchus*) genome reveals synteny in Coleoptera**  
2 **across 200 million years of evolution**

3  
4  
5 **Abstract**

6 Patterns of genomic architecture across insects remain largely undocumented or decoupled from  
7 a broader phylogenetic context. For instance, it is unknown whether translocation rates differ  
8 between insect orders? We address broad scale patterns of genome architecture across Insecta by  
9 examining synteny in a phylogenetic framework from open source insect genomes. To  
10 accomplish this, we add a chromosome level genome to a crucial lineage, Coleoptera. Our  
11 assembly of the *Pachyrhynchus sulphureomaculatus* genome is the first chromosome scale  
12 genome for the hyperdiverse Phytophaga lineage and currently the largest insect genome  
13 assembled to this scale. The genome is significantly larger than those of other weevils, and this  
14 increase in size is caused by repetitive elements. Our results also indicate that, among beetles,  
15 there are instances of long-lasting (>200 Ma) localization of genes to a particular chromosome  
16 with few translocation events. While some chromosomes have a paucity of translocations, intra-  
17 chromosomal synteny was almost absent, with gene order thoroughly shuffled along a  
18 chromosome. To place our findings in an evolutionary context, we compared syntenic patterns  
19 across Insecta. We find that synteny largely scales with clade age, with younger clades, such as  
20 Lepidoptera, having especially high synteny. However, we do find subtle differences in the  
21 maintenance of synteny and its rate of decay among the insect orders.

22

23

## 24 INTRODUCTION

25

26 Beetles represent one of the most diverse groups of metazoans, with ~400,000 described species  
27 (Hammond 1992), and estimates of total diversity up to 0.9–2.1 million species (Stork et al.  
28 2015). Among beetles, weevils (Coleoptera: Curculionidae) are one of the most diverse insect  
29 groups (>60,000 species (Oberprieler et al. 2007)), encompassing a huge range of life history  
30 strategies and occupying every conceivable niche in a terrestrial ecosystem. With morphological  
31 forms specialized to ecological habits, such as feeding on fungi, seeds, pollen, wood, roots, and  
32 even kangaroo dung, weevils make an excellent system in which to study the evolution of  
33 different ecomorphologies (Zimmerman 1994, Oberprieler et al. 2007). Weevils belong to the  
34 group Phytophaga whose members comprise lineages that specialize on and have co-diversified  
35 with many plant lineages (McKenna et al. 2009, Seppey et al. 2019). Given their vast diversity  
36 and economic importance as pollinators and crop pests, knowing more about the genomic  
37 architecture of beetles should be of broad applicability. However, to date, there are only four  
38 available genomes resolved to chromosome level for Coleoptera and none for weevils or the  
39 hyperdiverse beetle lineage Phytophaga (Van Belleghem et al. 2018, Fallon et al 2018, Zhang et

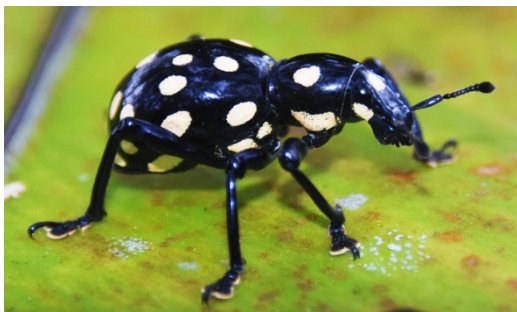

al. 2020, Herndon et al. 2020). Here we present the first  
genome resolved to chromosome level for the  
Phytophaga beetle lineage *Pachyrhynchus*  
*sulphureomaculatus* Schultze, 1922.

44 **Figure 1.** *Pachyrhynchus sulphureomaculatus*,  
45 lateral habitus. (photo by A. Cabras)  
46

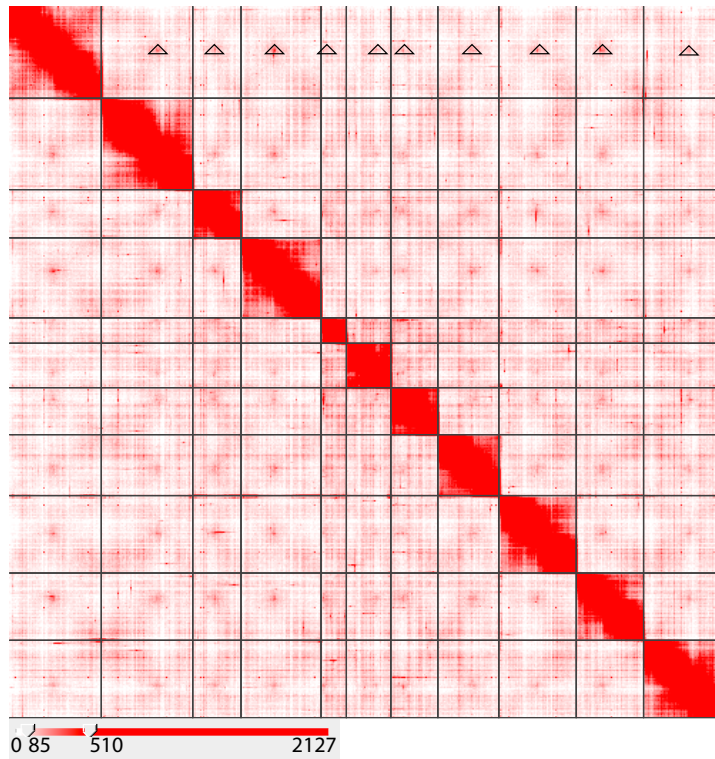

47

48 **Figure 2.** Hi-C contact map heatmap of *Pachyrhynchus sulphureomaculatus* Schultz, 1922. Eleven  
49 chromosome boundaries are indicated by black lines. Heatmap scale lower left, range in counts of mapped Hi-  
50 C reads per megabase squared. Rabl-like pattern highlighted along chromosome 1, top row, open triangles  
51 indicate contact between centromere regions. X-like pattern between adjacent off diagonal regions indicative  
52 of contact between distal portions of chromosomes.

53

54 Recent advances in genome assembly techniques, such as in situ high throughput conformation  
55 capture technology (Hi-C) (Lieberman-Aiden et al. 2009), have substantially enhanced our  
56 knowledge of genome architecture (Rao et al. 2014, Dudchenko et al. 2017, Eagen et al. 2017).  
57 Increasing the accuracy and contiguity of genome assemblies has also been aided by using long-  
58 read sequencing technology in combination with in situ Hi-C (Ghurye et al. 2017, Matthews et  
59 al. 2018, Song et al. 2018, Kingan et al. 2019, Scheffer et al. 2020). These innovations have  
60 allowed researchers to not only reconstruct genomes to chromosome scale but also to do so

61 relatively quickly and cheaply (Dudchenko et al. 2018). In addition, in situ Hi-C technology has  
62 shown that the 3D conformation of genomes is not random and that this conformation can  
63 influence gene expression and linkage (Sanborn et al. 2015). The result of these new sequencing  
64 techniques has increased the number of high quality genomes for non-model insect species,  
65 including beetles (Matthews et al. 2018, Hill et al. 2019, Lu et al. 2019, Liu et al. 2019, Biello et  
66 al. 2020, Herndon et al. 2020, Zhang et al. 2020). Because in situ Hi-C orders scaffolds and  
67 corrects misjoins, we can study synteny between organisms with more confidence (Dudchenko et  
68 al. 2017, Ghurye et al. 2019).

69  
70 With the influx of new chromosome-level genomes, we can now begin to explore patterns of  
71 genome architecture within and between major insect lineages. For example, in Lepidoptera  
72 (butterflies), genome architecture has been characterized as relatively stable with few (6%)  
73 orthologous loci being translocated (Ahola et al. 2014, Davey et al. 2016, Hill et al. 2019, Wan et  
74 al. 2019). Holocentric chromosomes observed throughout Lepidoptera are implicated in reducing  
75 hybridization limitations, (Marec et al. 2001, Lukhtanov et al. 2018, Edelman et al. 2019, Hill et  
76 al. 2019) suggesting that genome architecture plays a significant role in their biology. In  
77 *Heliconius* butterflies, the inversion and rearrangements that do occur do not seem to hinder  
78 hybridization (Edelman et al. 2019). In contrast to Lepidoptera, *Drosophila* species have many  
79 more translocations and rearrangements (Renschler et al. 2019). In beetles, however, even a  
80 basic understanding of genomic architecture remains undocumented. The basic blueprints as  
81 revealed by in situ Hi-C maps of how a genome is organized (e.g. – with a Rabl-like  
82 conformation (Rabl 1885, Csink and Henikoff 1998), holocentric chromosomes, chromosome  
83 domain territories, compartments, and topological associated domain loops) remain non-existent

84 and therefore unplaced in a phylogenetic context. A general synthesis across insects linking these  
85 genomic architectural patterns to their function and potential influence on speciation remains  
86 incomplete. For example, do different insect orders have distinct rates of genomic  
87 rearrangements (the breakage of synteny between genes), or are the patterns we observe merely  
88 due to clade age? Are there aspects of a lineages' genomic architecture that contribute to their  
89 observed syntenic patterns? Here we address these questions and provide a new chromosome-  
90 level genome for Coleoptera.

91

## 92 RESULTS

### 93 *Sequencing and assembly results*

94 From our PacBio library we sequenced a total of 87,452,300,317 base pairs (bp) with an  
95 N50 read length of 31,404 bp (see Supplemental Information Table 1 for full report). From our in  
96 situ Hi-C library (we refer to the in situ Hi-C library or reads as “Hi-C” throughout), we  
97 sequenced a total of 228,169,567 paired reads after cleaning. Only 2.53% of our Hi-C reads were

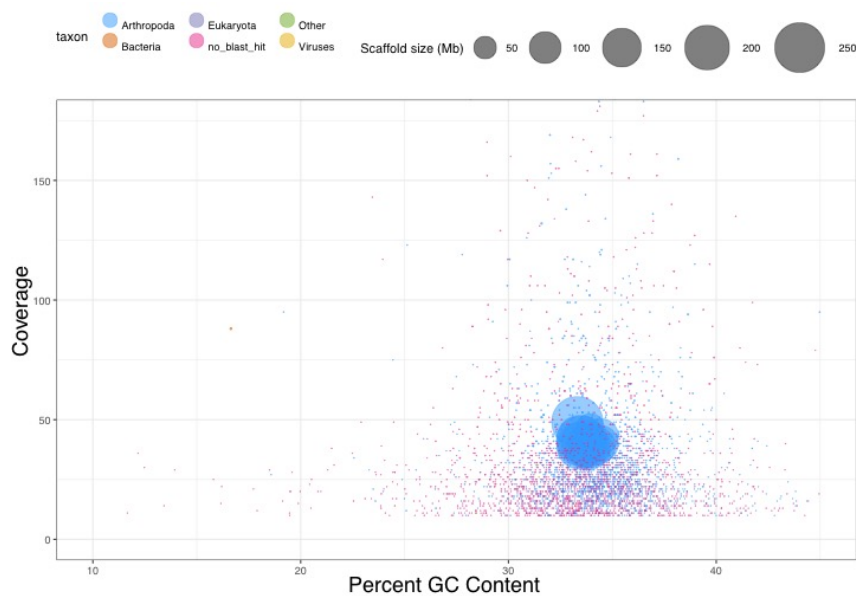

98 **Figure 3.** *P. sulphureomaculatus* scaffold bubble plot of coverage versus GC content. Scaffolds included are  
99 from the unfiltered assembly. Taxonomic annotation provided via *blastn* alignment to the NCBI nt database.

100 unmapped, and we had a total of 80,652,881 Hi-C contacts. For a list of the intra-/inter-  
101 chromosomal contacts and long/short range Hi-C contacts, see Table 1.

102 Our initial assembly after 3X polishing in RACON (Vaser 2017) consisted of 18,240  
103 scaffolds and was 2,982,578,979 bp in total length. After removing duplicate haplotigs with  
104 *Purge Haplotigs* (Roach et al. 2018), 9,751 scaffolds and 2,052,097,903 bp remained (Fig. 2).  
105 Our initial Hi-C assembly resulted in 4,111 and 2,057,226,403 bp total. The size increase is due  
106 to 500 bp insertions of Ns (the 3D-DNA default), between scaffolds merged into super-scaffolds.  
107 Running *Pilon* (v. 1.23) (Walker et al. 2014) in "--fix bases" mode and removal of mitochondrial  
108 and contaminant scaffolds (virus or bacteria) resulted in 4,093 scaffolds and 2,051,389,195 bp. A  
109 bubble plot of scaffolds by taxon category, and a table of the chromosomes scaffold N50s are  
110 shown in Fig. 3 and Table 2, respectively. The identity of other scaffolds not included in the  
111 main chromosomes are ambiguous (14 potential viruses and 31 potential bacteria). We retained  
112 these but did remove any with bacteria or virus as their best blast score those previously  
113 mentioned. The full summary statistics of our final assembly are shown in Table 2. From the  
114 different versions of BUSCO (Felipe et al. 2015) Insecta gene sets (1658 BUSCOs version 2,  
115 1367 version 4 and 5-beta), the percentage of complete genes varied (90.8% V2, 87.6% V4 and  
116 91.1% V5 (Fig. 4)), indicating a relatively complete assembly. Compared to other chromosome-  
117 level beetle genomes, we found a comparable number of complete BUSCO genes. However, the  
118 results vary somewhat depending on which version of BUSCO and which genes were used (Fig.  
119 4). We found a relatively low duplication rate compared to that found in two other beetle  
120 (*Photinus* firefly and *Propylea* ladybeetle) genomes that used primarily long-read and Hi-C  
121 sequencing in their assembly.

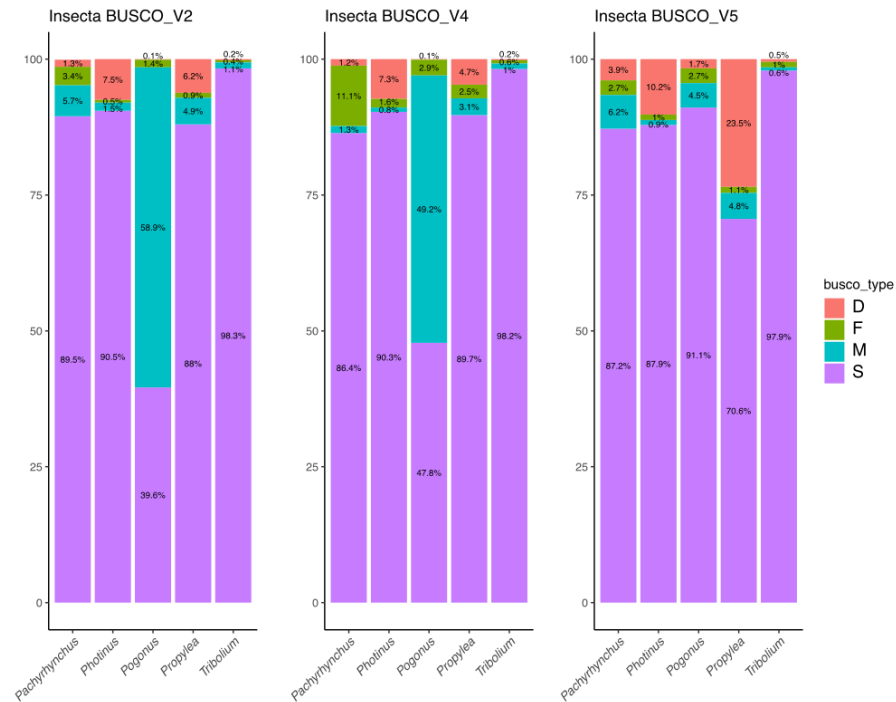

122 **Figure 4.** Stacked bar plot of Insecta BUSCO gene sets by category for chromosome-level beetle genomes. Y-  
 123 axis is the percent of BUSCO genes, X-axis labels are the genus names. The abbreviations in the legend are:  
 124 D=duplicated, F=fragmented, M=missing and S=single.

125

### 126 ***Repeat content analyses***

127 At 2.05 Gbp, the *Pachyrhynchus sulphureomaculatus* genome is roughly 1.8 times as large as the  
 128 next largest weevil (Curculionoidea) genome published to date, the 1.11 Gbp *Listronotus*  
 129 *bonariensis*, the Argentine Stem Weevil (Harrop et al. 2020), and 2.6 times the next largest, the  
 130 782 Mbp Red Palm Weevil, *Rhynchophorus ferrugineus* (Hazzouri et al. 2020) genome. To help  
 131 explain the size difference, we categorized the repeat content of *P. sulphureomaculatus*. The  
 132 repeat content analyses from *RepeatMasker* shows that the genome of *P. sulphureomaculatus*  
 133 consists of more than three quarters (76.36%) repetitive DNA, similar to the repeat percentage of  
 134 *Listronotus*, which is the closest relative to *Pachyrhynchus*. Compared to other weevil genomes  
 135 (Fig. 5), *P. sulphureomaculatus* has roughly the same percentage of non-repetitive DNA as



136 *Listronotus* and *Sitophilus*. However, the genomes of the two bark beetles of the subfamily  
 137 Scolytinae (*Dendroctonus* and *Hypothenemus*), are  $\sim 1/12$  the size of *P. sulphureomaculatus* and

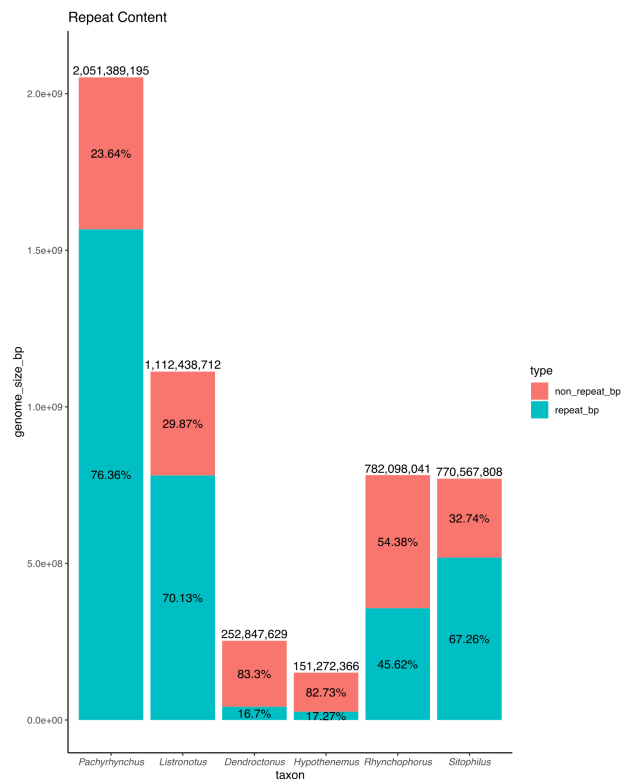

consist of only  $\sim 17\%$  repetitive content. The  
*P. sulphureomaculatus* genome consisted of  
 73.1% interspersed repeats, with SINEs being  
 0.1%, LINEs 20.8%, LTR elements 2.6%,  
 DNA elements 33% and unclassified repeats  
 16.6%. A sliding window analysis suggests  
 that repetitive content tends to be found in a  
 higher percentage towards the ends of the  
 chromosomes in *P. sulphureomaculatus*,  
 except in chromosome 5 (Fig. 6).

149 **Figure 5.** Histogram of repeat content for weevil genomes.

150

### 151 **Genome annotation**

152 After removing low quality reads from our transcriptome library, a total of 20,551,938  
 153 paired reads remained. Our initial 3 transcriptome assemblies, *Trinity* de novo, *Trinity* genome  
 154 guided assembly and *rnaSPAdes*, resulted in fairly similar assemblies, with each having a high  
 155 number ( $\sim 90\%$ ) of the BUSCO v.2 Arthropoda genes (see Supplemental Information Table 2 for  
 156 details).

157 As the nuclei of cells between different species generally do not interact (except for  
 158 viruses), and because Hi-C mapping will remove any non-*Pachyrhynchus* DNA from the  
 159 chromosomes, we only annotated genes found within the 11 chromosomes comprising

160 2,000,581,858 bp. The *EvidenceModeler* analysis found that the *P. sulphureomaculatus*  
161 contained, as percentages of length, 26.00% genes, 1.46% exons and 24.54% introns, with  
162 30,175 genes, totaling 520,120,665 bp with a mean length of 17,236.81. There are a total of  
163 10,009 single exon genes (33.17% of genes), a total of 120,454 exons with a mean of 3.99 exons  
164 per gene, a length of 242.1 bp and per gene length of 966.41bp. There are a total of 90,279  
165 introns with a mean of 2.99 per gene, a length of 5,438.24 bp and a per gene length of 16,270.4  
166 bp. The distribution of gene, exon and intron sizes can be found in the Supplemental Information  
167 file “Size\_of\_Genes\_Exons\_Introns”. The gff and tRNA annotations are also in the  
168 Supplemental Information. Chromosome gene distribution is relatively even, with only a few  
169 regions enriched with genes (Fig. 6).

170

### 171 ***Synteny across coleopteran chromosome-level genomes***

172 We found BUSCO v.2 loci (1658 Insecta gene set) had a low level of translocations between  
173 chromosomes (Fig. 7). Our UCE set resulted in 295 loci among taxa and recovered an identical  
174 topology and similar dates as in McKenna et al. (2019). We also found a similar synteny pattern  
175 between BUSCO genes and those from our UCE set (Supplemental Information file  
176 “BUSCO\_UCE\_chromosome\_Tcas\_Psulph”). Results show that within a chromosome, the order  
177 of BUSCO genes is not conserved (Fig. 7), with few long segments of synteny within a  
178 chromosome. Synteny is greatest between *P. sulphureomaculatus* and the three Polyphaga  
179 beetles, and least between Adepaga (*Pogonus*) and *P. sulphureomaculatus*. Interestingly, there  
180 is more synteny between *P. sulphureomaculatus* and *Photinus pyralis* (firefly) (Fallon et al.  
181 2018) than between *P. sulphureomaculatus* and *Propylea japonica* (ladybird beetle), the closer

182 relative of the two, indicating that the lineage leading to *Propylea* has undergone many more  
183 chromosomal translocation events (Fig. 7 and 8).

184 We computed the Ensemble Gene Order Conservations (GOC) scores (ref) across all  
185 pairwise comparisons for our 34 taxa; results are in Supplemental Information file  
186 “GOC\_results\_matrix.txt”. We recovered 1356 BUSCO Genes for the 70% complete matrix,  
187 totaling 546,311 amino acids in length. The phylogeny recovered the same clades as in Misof et  
188 al. (2014). The GOC scores tended to vary with phylogenetic distance between taxa. For  
189 example, the hemipterans *Triatoam rubrofasciata* and *Rhodnius prolixus* (Reduviidae) scored  
190 0.73, and between *R. prolixus* and the pea aphid *Acyrtosiphon pisum*, 0.01. Results from the  
191 Mantel test between phylogenetic distance and GOC score found that the two variables were  
192 correlated ( $P \leq 0.001$ ).

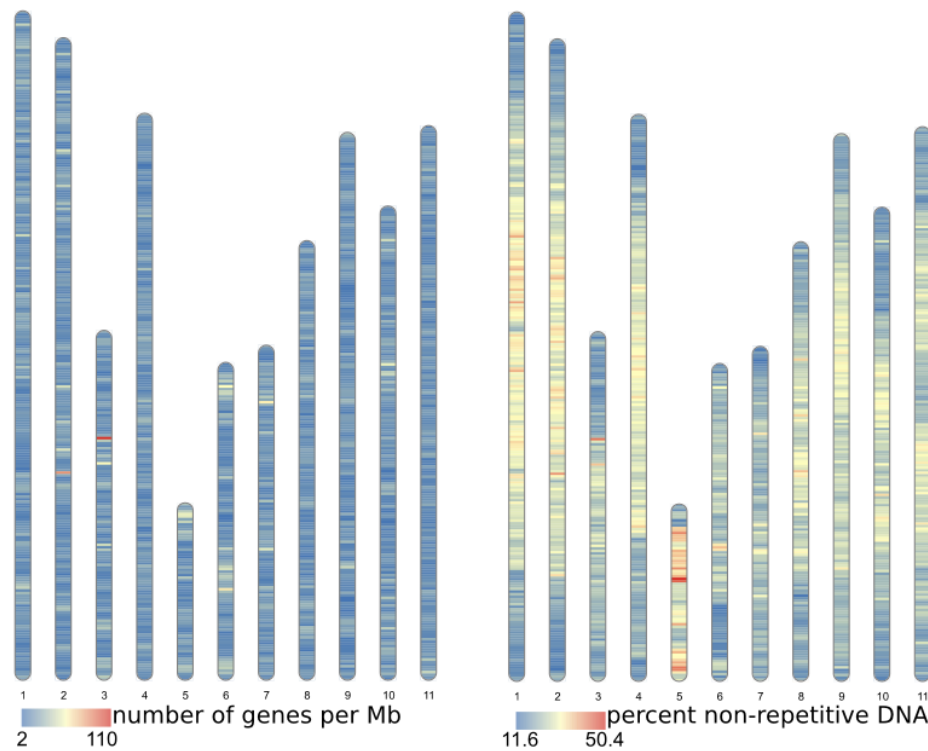

194 **Figure 6.** Heat map of gene density and non-repetitive DNA per 1 Mb sliding window. The 11 chromosomes  
195 are in the same order as in the Hi-C heat map (Fig. 1) and fasta file of the genome.

196

## 197 **DISCUSSION**

198

199         The combination of long-read DNA and Hi-C sequencing was successful in resolving a  
200 large and highly repetitive insect genome. To date, this is the largest insect genome and one of  
201 the largest arthropod genomes assembled to chromosome scale, the horseshoe crab's (*Tachypleus*  
202 *tridentatus*) being only slightly larger (2.06 Gb vs 2.05 Gb) (Zhou et al. 2020). This is  
203 remarkable because the assembly of relatively large and highly repetitive insect genomes into  
204 highly contiguous ones such as this was previously unattainable (Li et al. 2020). Those efforts  
205 were hindered by repetitive contents breaking scaffolds or misjoining them (Dudchenko et al.  
206 2017, Hill et al. 2019, Li et al. 2020). The unusually large size of the *Pachyrhynchus* genome is  
207 mostly due to the inflated proportion of repetitive content, 76.4% of the genome (Fig. 5). Again,  
208 highlighting the need for long sequencing reads to span the repetitive content. Here we used a  
209 single individual to create both our Hi-C and PacBio libraries. The main advantage over using  
210 multiple individuals is little loss of Hi-C reads mapped to the scaffolds; it also eliminates the  
211 need for isogenic lines to be established before sequencing. In our previous attempts to assemble  
212 a genome for *Pachyrhynchus*, we were greatly hindered by the loss of mappable reads when  
213 using multiple individuals. As long read sequencing improves in its capabilities of using a small  
214 amount (5–50 ng) of DNA, capitalizing on this combination of Hi-C and long-read sequencing  
215 will make it feasible to assemble chromosome scale genomes from single, very small insect  
216 specimens (Kingan et al. 2019, Schneider et al. 2020).

217

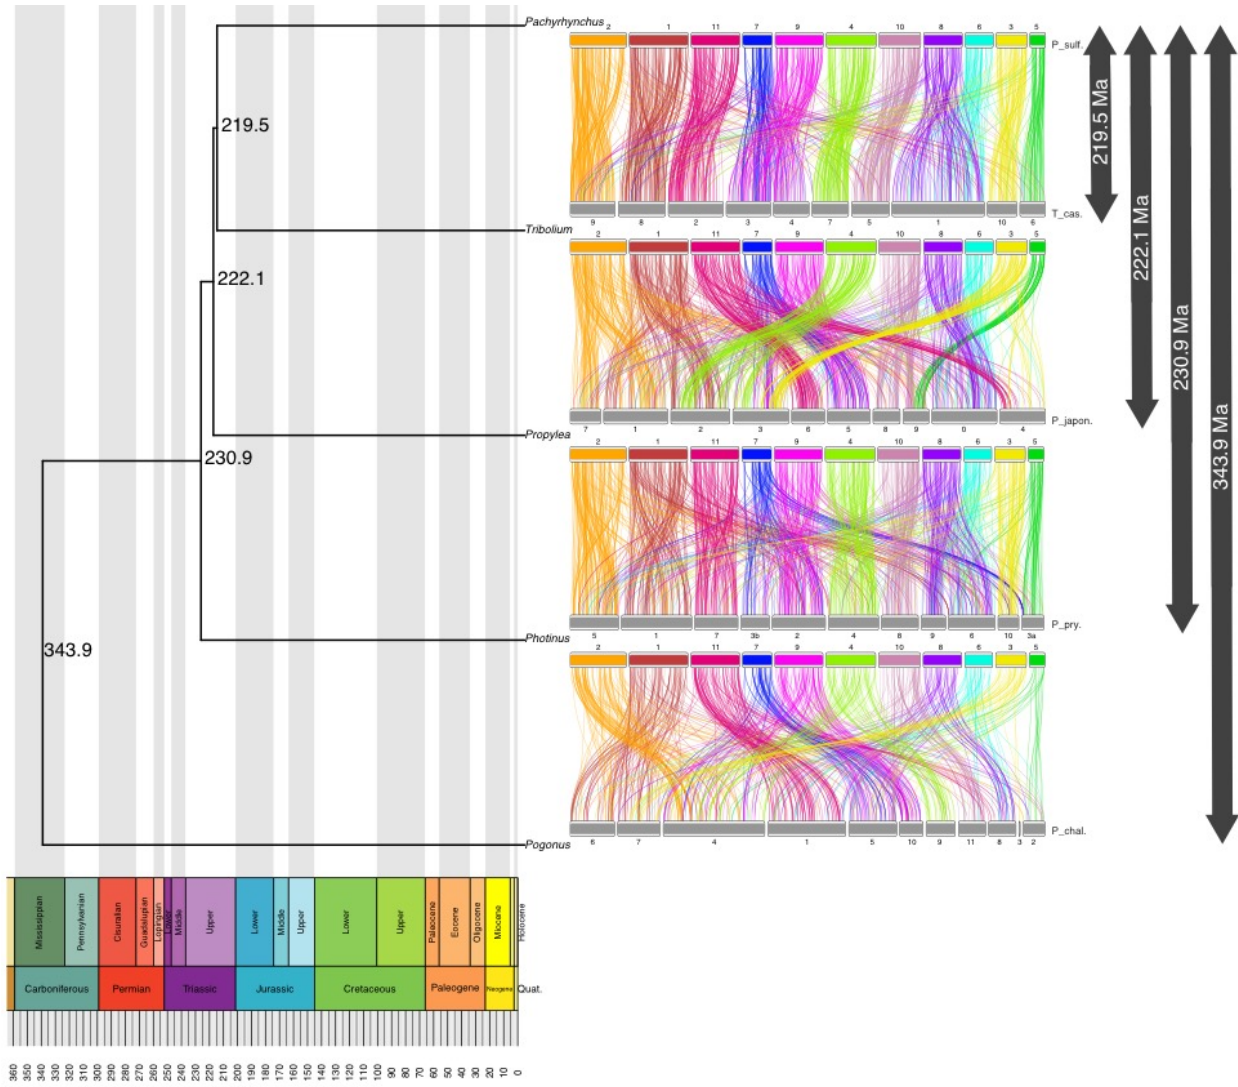

218

219 **Figure 7.** Chronogram and ideograms of the 5 beetle genomes which have chromosome level assemblies.

220

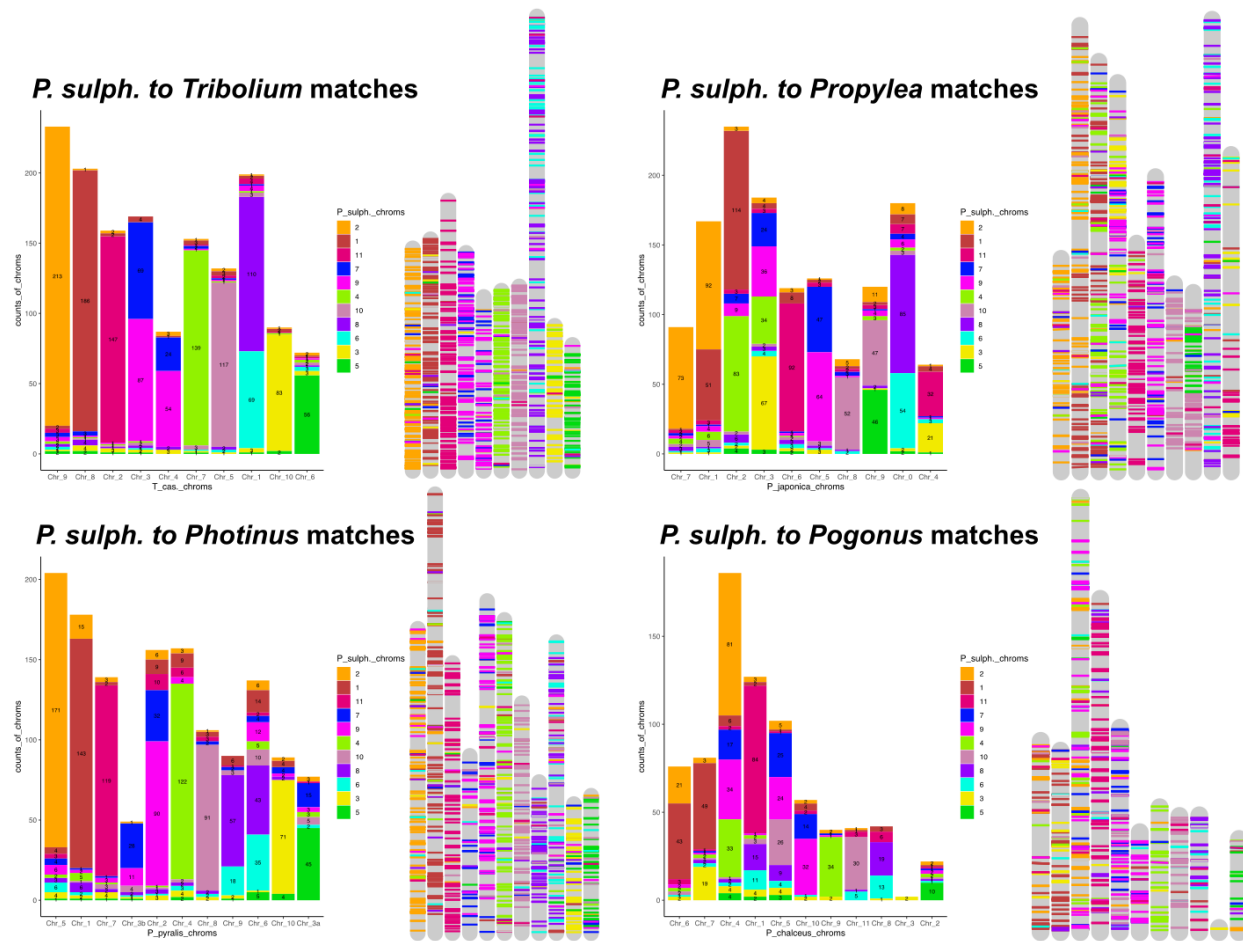

221

222 **Figure 8.** Stacked bar plots and chromosome mappings of BUSCO genes' placements. Colors correspond to *P.*

223 *sulphureomaculatus* chromosomes. The numbering scheme of chromosomes matches the names found in the

224 genome's fasta file.

225

226 The conserved inter-chromosomal synteny (few chromosome translocations) between the beetle

227 genomes is surprising given the divergence times of the different lineages. For example, we

228 recovered chromosomes that have remained 80–92% intact for more than 200 Ma (Figs. 7–8). By

229 contrast, the order of the BUSCO genes inside of the chromosomes are highly rearranged, such

230 as chromosomes 8 and 6 in *Pachyrhynchus* and chromosome 1 in *Tribolium* (Figs. 7–8). This

231 initial finding prompted us to examine whether similar patterns are observed across other insect

232 orders. A characteristic of Lepidoptera is having a high level of synteny across different families

233 (Hill et al. 2019, Wan et al. 2019). When we examine the ages or relative branch lengths between  
234 clades, we find that much of the synteny is correlated with clade age (Fig. 9), as well as from the  
235 results of the Mantel test ( $P \leq 0.001$ ). Although Lepidoptera tends to exhibit more synteny given  
236 the phylogenetic distance between taxa, there are a few examples other than *Drosophila* in this  
237 same time period to compare against (Fig. 9). Currently, chromosome-level genomes are not  
238 available for Trichoptera (caddisflies, the sister lineage to Lepidoptera) or early diverging  
239 lineages of Lepidoptera. With the addition of these lineages, we could determine whether the  
240 observed pattern of synteny conservation is found only in Lepidopteran crown groups or whether  
241 it is more widely dispersed across the entire Lepidopteran lineage. Another order with a  
242 somewhat similar level of synteny as in Lepidoptera given their divergence times are Hemiptera  
243 (Fig. 9), although there are only 2 comparisons with the same level of divergence (Fig. 9). Taxa  
244 with much less synteny given their divergence times are Hymenoptera and Diptera (Fig. 9). The  
245 finding that synteny tends to decay with age is not surprising; however, there are some insect  
246 orders that are more or less syntenic than expected given their age. For example, in *Drosophila*,  
247 there is less synteny between members of this genus (~40 Ma) than across all of Lepidoptera or  
248 the Aphidae that we examined. These results of gene order conservation are consistent with  
249 research of *Drosophila* topological associated domains (TADs) that showed synteny break points  
250 at approximately every 6th gene between *D. melanogaster*, *D. virilis* and *D. busckii*, which have  
251 a similar level of divergence as the *Drosophila* taxa we examined, about 40 Ma of divergence  
252 (Renschler et al. 2019). In addition, the chromosomal rearrangement across *Drosophila* tends to  
253 occur at TAD boundaries, not inside the loops (Renschler et al. 2019, Liao et al. 2020). In  
254 *Anopheles* mosquitos, the TAD structures seem to be associated with cytological structures as  
255 well (Lukyanchikova et al. 2020).

256           Recent studies in Diptera have demonstrated that syntenic breakpoints tend to occur at  
257 the boundaries between TADs (Renschler et al. 2019, Liao et al. 2020, Lukyanchikova et al.  
258 2020). Despite having many breakpoints, with relatively few chromosome translocations, the  
259 dipteran chromosomes largely remain intact (Bracewell et al. 2019). In Coleoptera we find a  
260 somewhat similar syntenic pattern, in that the chromosomes remain intact while also being  
261 highly shuffled (Figs. 7–8). Given the divergence time between our taxa, when translocations do  
262 occur, their initial positions are lost due to a high level of reorganization producing a pattern of  
263 interwoven segments. For example, chromosomes 8 and 9 in *Pachyrhynchus* and the large  
264 chromosome 1 in *Tribolium* (Fig. 8), there are no large syntenic runs of genes or obvious places  
265 of translocation. In contrast, chromosome 9 of *Propylea* and chromosome 5 of *Pachyrhynchus*  
266 are still largely intact, with the homologous segment of chromosome 5 inserted into roughly the  
267 middle of *Propylea*'s chromosome 9. Across the Coleoptera we examined, this was the only  
268 fusion event that could be roughly placed. Given the relative amount of reshuffling along other  
269 parts of this chromosome, the ability to place the insertion indicates that this was a relatively  
270 recent event. This large amount of reshuffling within chromosomes with few inter-chromosomal  
271 events contrasts with patterns seen in mammals in which the chromosomes tend to exchange  
272 larger blocks of material more readily (Chowdhary et al. 1998, Kemkemer et al. 2009, Deakin  
273 2018, Simison et al. 2020).  
274



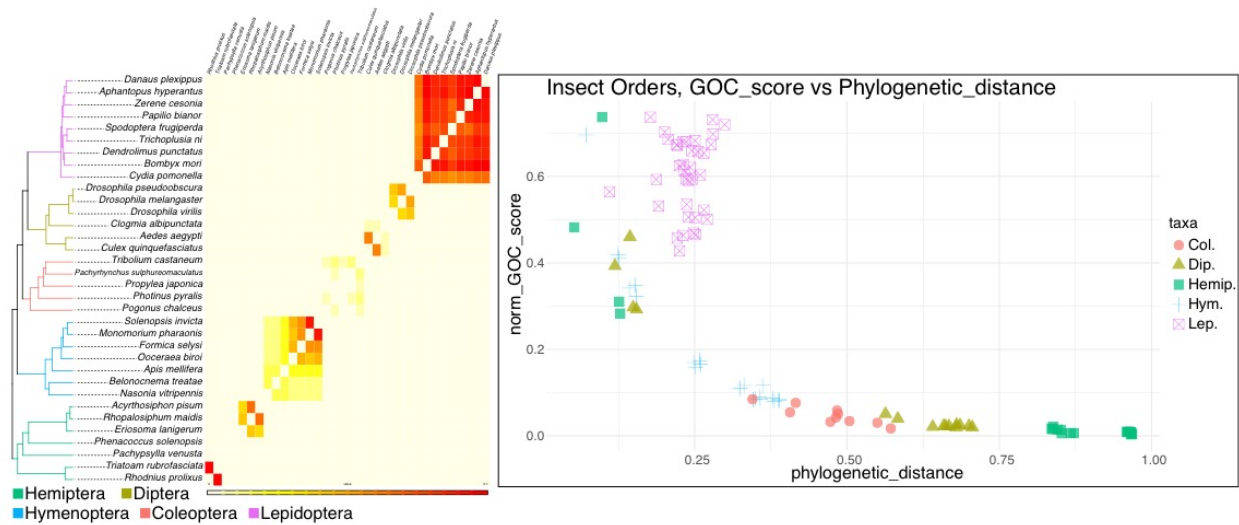

275

276 **Figure 9.** Insecta, gene order conservation score (GOC) plot. Left panel, chronogram, branches colored by  
 277 order. Heat map of normalized pairwise GOC scores, redder boxes indicate more synteny between pairs. Right  
 278 panel, within order normalized pairwise GOC score versus phylogenetic distance.

279

280 Another architectural feature of *Pachyrhynchus*' genome above the chromosome level  
 281 includes the Rabl-like configuration of chromosomes, where centromeres and telomeres cluster  
 282 at opposite/different regions of the cell. These features are important to note because they may  
 283 serve an important evolutionary function, such as reducing chromosomal entanglements during  
 284 interphase as well as regulating chromosomal compartmentalization (Mizuguchi et al. 2015,  
 285 Pouokam et al. 2019). Both major lineages of Diptera, the Nematocera (e.g. mosquitoes and  
 286 Psychodidae) and Schizophora (e.g. *Drosophila*), have cells with a Rabl-like configuration  
 287 (Csink and Henikoff 1998, Dudchenko et al. 2017, Matthews et al. 2018). These taxa span much  
 288 of the phylogenetic distance across the dipteran lineage, and thus this pattern of chromosomal  
 289 organization may be characteristic of Diptera. We also observe the Rabl-like configuration in  
 290 *Pachyrhynchus* as well as in the Hi-C map of *Tribolium* (DNA Zoo Consortium et al. 2020). Hi-  
 291 C map observations for the other taxa do not indicate any other obvious cases of the Rabl-like

292 configuration within the Insecta. However, improving the quality of existing Hi-C maps would  
293 provide more evidence for this observation because a lack of valid Hi-C reads can obscure this  
294 type of chromosomal architecture.

295         The Rabl-like configuration is not restricted to beetles and flies; it is also found in the  
296 yeast genome (Jin et al. 1998, Goto et al. 2001, Mizuguchi et al. 2015, Kim et al. 2017) as well  
297 as in wheat, barley and *Brassica* (Santos and Shaw 2004, Mascher et al. 2017, Concia et al.  
298 2020, Wang et al. 2019), and was originally described from salamander cells (Rabl 1885). It is  
299 unclear how widespread the Rabl-like configuration is in Coleoptera. The Hi-C maps of the other  
300 beetle genomes do not display this formation and are from similar tissue types to what we used  
301 (Fallon et al. 2018). It could be that this configuration is only in the Tenebrionoidea and  
302 Phytophaga lineages, where it is presently observed. It is assumed that the Rabl-like  
303 configuration is found in all life stages, as appears to be the case in Diptera (Dudchenko et al.  
304 2017, Matthews et al. 2018, Lukyanchikova et al. 2020). Additionally, while the Rabl-like  
305 configuration is found in different life stages (egg, larva, adult) of *Drosophila*, it is found  
306 intermittently in cells, e.g. found in *Drosophila* larvae early G1 and not in late G1 interphase of  
307 mitosis (Csink and Henikoff, 1998). Moreover, some organisms' cells possess a Rabl-like  
308 configuration more often during mitosis as compared to other organisms (Idziak et al. 2015).  
309 Therefore, what is visualized on the Hi-C map is not that all cells possess the Rabl-like  
310 configuration all the time; instead, it is an average of the occurrence in a particular organism's  
311 cells. While the Rabl-like configuration is the predominant chromosomal arrangement observed  
312 thus far in Diptera and some Coleoptera, its evolutionary significance remains unclear. Genomic  
313 architecture's influence on diversity, if any, is hindered by the sparse, haphazard sampling of  
314 insect genomes. It may be tempting to ascribe patterns to clades (such as Lepidoptera being

315 highly conserved in their genome architecture), but such patterns fade in a broader phylogenetic  
316 context or remain to be fully tested. Rather than one to one comparisons, it is more meaningful to  
317 describe patterns for a clade in a broader phylogenetic context.

318 In summation, we have reconstructed one of the largest and most repetitive arthropod  
319 genomes. With the combination of Hi-C reads and PacBio long-read sequencing data, we were  
320 able to resolve a highly contiguous, chromosome-level genome. We find patterns of genomic  
321 architecture, specifically, synteny across Insecta, largely scales with clade age, with some  
322 groups, such as Lepidoptera and Diptera, showing subtly different patterns.

323

324

## 325 **METHODS**

326

### 327 *Taxon selection and natural history*

328 *Pachyrhynchus*, from the entirely flightless tribe Pachyrhynchini, is found from the  
329 Philippines to Papua New Guinea, Australia, Taiwan, Japan, and Indonesia (Schultze, 1923;  
330 Alonso-Zarazaga & Lyal, 1999). They are known for their bright, iridescent and unique elytral  
331 markings, which they use as an aposematic signal to warn predators of their unpalatability  
332 (Tseng et al., 2014). Members of other weevil groups (e.g. *Polycatus*, *Eupyrigops*, *Neopyrigops*,  
333 *Alcidodes*) and long-horned beetles (e.g. *Doliops*, *Paradoliops*) mimic *Pachyrhynchus*'  
334 aposematic signals to ward off predators. Currently, the Pachyrhynchini has 17 known genera,  
335 with the majority found exclusively in the Philippines (Schultze, 1923; Yap & Gapud, 2007;  
336 Yoshitake, 2013, 2018).

337 *Pachyrhynchus* Germar, 1824 has the widest geographic range among Pachyrhynchini.  
338 There are presently 145 species in the genus, of which 93% of are endemic to the Philippines  
339 (Rukmane, 2018), with the majority of species having a narrow geographic range, limited to a  
340 mountain range, island, or Pleistocene Aggregate Island Complex (PAIC) (Inger 1954, Heaney  
341 1985, Brown and Siler 2014). The general diagnostic characters of *Pachyrhynchus* Germar, 1824  
342 include a head lacking a distinct transverse groove or distinct basal border, entire episternal  
343 suture, and antennal scape not reaching the hind eye (Schultze, 1923; Yoshitake, 2012). *P.*  
344 *sulphureomaculatus* Schultze, 1922, is only recorded from Mindanao Island (Schultze, 1922;  
345 Cabras et al., 2017; Rukmane, 2018). This species was described from material collected in  
346 South Cotabato but has recently been recorded (personal observations of A. Cabras) in other  
347 areas of Mindanao (e.g. Marilog, Davao City, Arakan, Cotabato, Mt. Kiamo, Bukidnon). This  
348 species belongs to the *P. venustus* group, conspicuous for their large size, prothorax with two  
349 dorsolateral spots in the middle a large, oblong spot at the lateral margins, and elytra with oval or  
350 oblong spots (Schultze, 1923).

351

### 352 ***Collection and extraction of DNA***

353 Specimens were collected near the edge of the road in a secondary forest (HWY 81,  
354 Arakan, Cotabato, Philippines [N7.487059, E125.248795]). One individual was used for both in  
355 situ Hi-C and high molecular weight DNA libraries. A second individual was used for  
356 transcriptome sequencing. Individuals were collected live, then frozen and stored at -80°C until  
357 library preparation.

358 Beetle tissues were dissected carefully to avoid inclusion of contaminants from guts and  
359 impurities from chitinous cuticles. Half of the resulting tissues were used for Phenol Chloroform

360 (PCI) based high molecular weight (HMW) DNA extraction for PacBio sequencing (the other  
361 half of the material was used as starting material for Hi-C library preparation, see below).  
362 Tissues were homogenized on ice using a sterile razor blade. ATL buffer (140  $\mu$ l) and Proteinase  
363 K (60  $\mu$ l) were then added to the homogenized material and incubated at 65°C for 1 hr. The 200  
364  $\mu$ l of resulting lysate was used as starting material for the PCI extraction following a PacBio  
365 recommended protocol. ([https://www.pacb.com/wp-content/uploads/2015/09/SharedProtocol-Extracting-DNA-using-Phenol-](https://www.pacb.com/wp-content/uploads/2015/09/SharedProtocol-Extracting-DNA-using-Phenol-Chloroform.pdf)  
366 [Chloroform.pdf](https://www.pacb.com/wp-content/uploads/2015/09/SharedProtocol-Extracting-DNA-using-Phenol-Chloroform.pdf)). Two additional rounds of PCI clean-up were performed to eliminate impurities such  
367 as chitin to meet the DNA requirement for PacBio sequencing. In particular, to achieve OD  
368 ratios of 1.8–2.0. DNA concentration was determined with the Qubit™ dsDNA HS Assay Kit  
369 (Invitrogen corp., Carlsbad, CA), and high molecular weight content was confirmed by running a  
370 Femto Pulse (Agilent, Santa Clara, USA).

371

### 372 ***In situ Hi-C library preparation***

373 Tissues from the same sample were homogenized using a sterile razor blade on ice. An in  
374 situ Hi-C library was prepared as described in Rao et al. (2014) with a few modifications.  
375 Briefly, after the Streptavidin Pull-down step, the biotinylated Hi-C products underwent end  
376 repair, ligation and enrichment using the NEBNext® Ultra™II DNA Library Preparation kit  
377 (New England Biolabs Inc, Ipswich, MA). Furthermore, titration of the number of PCR cycles  
378 was performed as described in Belton et al. (2012).

379

### 380 ***Transcriptome library preparation***

381 RNA extraction was performed using tissues from a frozen sample. Tissue was extracted  
382 from the prothorax and abdomen with the digestive tract removed. The Monarch Total RNA

383 Miniprep kit (New England Biolabs Inc, Ipswich, MA) was used for extraction. The  
384 manufacturer's protocol for total RNA purification from tissue was followed (cite  
385 <https://www.neb.com/protocols/2017/11/08/total-rna-purification-from-tissues-and-leukocytes-using-the-monarch-total-rna-miniprep-kit-neb->  
386 [t2010](#)). RNA concentration was determined using the Qubit® RNA HS Assay Kit (Invitrogen  
387 corp., Carlsbad, CA), and intact RNA content was confirmed by running a Bioanalyzer High  
388 Sensitivity RNA Analysis (Agilent, Santa Clara, USA). The resulting RNA was sent to  
389 Novogene Inc. for library preparation and sequencing, from which 12.5 Gbp of data were  
390 obtained.

391

### 392 ***Genome sequencing and assembly***

393 First, we performed an initial quality control of the in situ Hi-C library using the CPU  
394 version of *Juicer* v 1.5.7 (Durand et al. 2016) to determine if enough ligation motifs were present  
395 in the sample. To accomplish this, we first cleaned our reads with *fastp* (Chen et al. 2018) to  
396 remove sequencing adapters and low quality reads with default settings except for the more  
397 sensitive '--detect\_adapter\_for\_pe' setting on. After passing the quality control of having >30%  
398 ligation motifs present, we proceeded to sequence the full library at higher coverage. We only  
399 considered ligation motifs as this was a de novo assembly without a closely related reference  
400 genome to align to the Hi-C reads. The full Hi-C library was sequenced on a paired-end (2x150  
401 bp) lane on an Illumina HiSeq4000. High molecular weight DNA was sent to the QB3 Genomics  
402 facility at the University of California Berkeley for sequencing on a Pacific Biosciences Sequel  
403 II platform, sequencing one cell with CLR version 2 chemistry (PacBio, Menlo Park, CA, USA).

404 We used *PacBio Assembly Tool Suite pb-assembly* v 0.0.8 (which includes the FALCON  
405 assembly pipeline) to assemble the primary scaffolds. Next, we polished the primary assembly  
406 using 3 rounds of mapping the raw fastq reads using *minimap2* (Li 2018) followed by using

407 RACON (Vaser 2017) to help error correct the initial assembly. This was followed by running  
408 the *Purge\_Haplotigs* (Roach et al. 2018) pipeline to eliminate haplotigs (alternative haplotype  
409 contigs) in the assembly. Next, using the CPU version of *Juicer* v 1.5.7, we created a site  
410 positions file for the restriction enzyme MboI using *Juicer*'s *generate\_site\_positions.py* script,  
411 followed by running *Juicer* until it creates the mapping stats file and a “*merged\_nodups*” file.  
412 Then we used the 3D-DNA (Dudchenko et al. 2017) pipeline with default settings to correct  
413 misjoins and place scaffolds into chromosome groups. After generating a Hi-C heat map, we  
414 corrected any assembly errors manually via *Juicebox Assembly Tools* v 1.11.08 (Durand et al.  
415 2016, Dudchenko et al. 2018). After, (Fig 1.) we ran 3D-DNA's *run-asm-pipeline-post-review.sh*  
416 to produce a final assembly file and fasta. To polish our final assembly further, we aligned our  
417 Hi-C reads to our scaffolds using *bwa mem* followed by *SAMclip* and *SAMtools* ‘view’ (Li et al.  
418 2009) with options ‘-S -b -f 2 -q 1 -F 1536’. After grouping scaffolds into chromosomes, we  
419 divided each into a separate fasta (due to memory constraints) and used *Pilon* (v. 1.23) (Walker  
420 et al. 2014) in “--fix bases” mode as to not break our scaffolds and to fix any homopolymer  
421 repeat errors. The resulting assembly was used in all subsequent analyses.

422

### 423 ***Removal of mitochondrial/contaminant DNA***

424 To identify scaffolds that contained mitochondrial cytochrome oxidase subunit 1 (COI)  
425 DNA, we used BLAT v. 35 (Kent 2002; 2012) using a reference sequence from *Pachyrhynchus*  
426 *smaragdinus* (Supplemental Information file “P79\_coI.fasta”) to query our scaffolds. Once  
427 identified, these scaffolds were removed. We also used *blast* (Camacho et al. 2008) with the nt  
428 database and default settings to identify contaminant (non-arthropod or undetermined) sequences  
429 and then removed these from the final assembly. These represented only a handful of sequences.

430

### 431 ***Repeat content analyses***

432 To address what is making the genome of *Pachyrhynchus sulphureomaculatus* so large  
433 relative to other complete weevil genomes (>85% Benchmarking Universal Single-Copy  
434 Orthologs BUSCO Insecta genes), we compared the repeat content of *P. sulphureomaculatus* to  
435 5 other weevil genomes from NCBI (Supplemental Information file  
436 “NCBI\_numbers\_for\_Weevils\_used\_in\_repeatmasker”). We used the de novo *RepeatModeler* v.  
437 open-1.0.11 (Smit et al. 2015) repeat set combined with all rebase recs to first model for repeat  
438 content. Next, we used *RepeatMasker* v. 4.1.0 (Smit et al. 2015) to annotate and soft mask repeat  
439 content. For *Listronotus*, we downloaded the results from Harrop et al. (2020), who used  
440 comparable methodologies. We also calculated the percentage of repetitive content (bases soft  
441 masked) in a 1 Mb sliding window across the chromosomes in *R* using a custom script.

442

### 443 ***Genome annotation***

444 We first cleaned our reads with *fastp* and concatenated the unpaired cleaned reads. We  
445 performed 3 different initial reconstructions of the transcriptome: 1) *Trinity* v. 2.11.0 (Grabherr  
446 et al. 2013; Haas et al. 2014) de novo assembly using default settings, 2) *Trinity* genome guided  
447 assembly, where we first aligned our reads with *tophat* v. 2.1.1 (Kim et al. 2013),  
448 3) *rnaSPAdes* (Bushmanova et al. 2019) de novo assembly. Selecting the *rnaSPAdes* assembly,  
449 because it had the most single copy *BUSCO V2* Arthropoda genes (Felipe et al. 2015), we  
450 mapped our reads to this soft masked assembly using *HISAT2* v. 2.2.0 (Kim et al. 2019), and  
451 formatted a bam file using *SAMtools* ‘view -b -f 3 -F 256 -q 10’. Next, we used *BRAKER* v. 2.1.5  
452 (Hoff et al. 2019) to create an annotated gff. This process used the bam file from *HISAT2* and



453 results from a *BUSCO* search as ‘seeding’ genes to make the resulting gff. In addition, we used  
454 the *PASA* pipeline (Campbell et al. 2006; Haas 2008) which used our *rnaSPAdes* transcripts  
455 aligned to the genome assembly with *BLAT* (Kent 2002) and *gmap* (Wu and Watanabe 2005).  
456 Lastly, we used *EVidenceModeler* (Haas et al. 2008) to evaluate our different annotations using  
457 the developers’ recommended weights for each assembly type to produce the final gene model  
458 gff.

459

#### 460 ***Synteny across coleopteran and Insecta chromosome-level genomes***

461 To examine the gene synteny between other Coleoptera genomes, we downloaded chromosome-  
462 level genomes from NCBI or supplied from the journal or authors website (Supplemental  
463 Information file “NCBI\_all\_taxa\_genomes\_list”) (Fallon et al. 2018; Zhang et al. 2020; Herndon  
464 et al. 2020; Van Belleghem 2018). We also used the unpublished genome assemblies (*Tribolium*  
465 *castaneum* [GCF\_000002335.3], *Bombyx mori* [GCA\_000151625.1], *Clogmia albipunctata*  
466 [clogmia.6], *Culex quinquefasciatus* [CpipJ3], and *Rhodnius prolixus* [Rhodnius\_prolixus-  
467 3.0.3]), generated by the DNA Zoo Consortium ([dnazoo.org](http://dnazoo.org)). The assemblies were based on the  
468 whole genome sequencing data from (Herndon et al., 2020; *Tribolium* Genome Sequencing  
469 Consortium 2008, International Silkworm Genome Consortium 2008, Arensburger et al. 2010,  
470 Mesquita et al. 2015) as well as Hi-C data generated by the DNA Zoo Consortium and  
471 assembled using 3D-DNA (Dudchenko et al., 2017) and Juicebox Assembly Tools  
472 (Dudchenko et al., 2018). Next, we identified the *BUSCO* v.2 loci, (1658 Insecta gene set) and  
473 extracted their coordinates for the single and fragmented loci. We then compared the coordinates  
474 of *Pachyrhynchus sulphureomaculatus* to the other Coleoptera genomes. Following, we  
475 calculated the number of loci found in *P. sulphureomaculatus* chromosomes and those in the

476 other Coleoptera and calculated the percent conserved within a chromosome. To visualize the  
477 shared synteny, we plotted the different pairs using the R package *RIdeogram* (Hao et al. 2020).  
478 To help visualize the relationship between the different taxa, we generated an ultraconserved  
479 elements (UCE) dataset between the taxa using the PHYLUCE pipeline (Faircloth 2012). We  
480 used the loci to help reconstruct a concatenated phylogeny in RAxML (Stamatakis 2014) and  
481 calculate branch lengths to render the tree ultrametric. We dated the tree using dates (95%  
482 highest posterior density interval HPD) from McKenna et al. (2019) using the R package *ape*  
483 v.5.4 ‘makeChronosCalib’ function (Paradis and Schliep 2019) (see Supplemental Information  
484 file “Insecta\_Claibrations\_table” for dates).

485         Next, we investigated whether the observed synteny was distinctive within Coleoptera  
486 relative to other orders of insects, such as Lepidoptera, in which high levels of synteny between  
487 taxa have been recorded (Hill et al. 2019, Ahola et al. 2014). We used all insect genomes (with  
488 some exceptions) available from NCBI that were marked as “chromosome” level. (See  
489 Supporting Information for a complete list.) We tried to sample evenly across insect orders. For  
490 example, we excluded the many *Drosophila* genomes as they are all phylogenetically close  
491 relatives, and this would cause over-representation (i.e. we want patterns of chromosomal  
492 evolution across Diptera, not just *Drosophila*). Instead, we sampled individual species across the  
493 phylogenetic breadth of the genus. In addition, we also gathered genomes from the literature.  
494 (see Supplemental Information file “NCBI\_all\_taxa\_genomes\_list”.) Next, we identified all  
495 BUSCO version 5-beta loci that were single copy and calculated the gene order conservation  
496 (GOC) score (see <https://m.ensembl.org/>) using a custom script (Supplemental Information files  
497 “1make\_scaff\_order\_busco\_tsv.sh”, and “2busco\_GOC.sh”). First, we ordered the BUSCO v5-  
498 beta genes by scaffold and position and then identified two genes upstream and downstream

499 from a particular gene. Next, to determine if a set of 4 genes are in the same order in our target  
500 genome, they receive a score of 1, 0.75, 0.5, 0.25 or 0 based on whether 4, 3, 2, 1 or 0 genes are  
501 in the same order, respectively. Missing genes between the two genomes are discarded from  
502 comparisons. This process is repeated along the length of the two genomes. We then summed the  
503 scores for the four categories 0-100% and added these categories together (e.g. if 8 matched *sets*  
504 were found at 25% and 1 at 100%, the total score would be 5). These total scores were  
505 normalized by dividing by the minimum number of genes present in the comparisons. We  
506 computed the total GOC scores for all pairwise comparisons among the 34 taxa. Next, to  
507 consider the effect of the phylogenetic relationships, we reconstructed the relationship among  
508 our taxa using the BUSCO gene sets' amino acids. We used custom scripts to identify a 70%  
509 complete matrix and used *mafft* with 1000 iterations and the “localpair” settings to align the  
510 sequences. Next, we used *trimAI* (Capella-Gutierrez et al. 2009) with “automated1” settings to  
511 remove ambiguously aligned positions. RAxML-ng with the LG+G8+F site rate substitution  
512 model was used to reconstruct the phylogeny for our exemplar taxa across Insecta. We calibrated  
513 our tree using the same methods for the beetle tree (above), and calibration points can be found  
514 in the Supplemental Information file “Insecta\_Claibrations\_table”, from Misof et al 2014,  
515 Obbard et al. 2012 and Mckenna et al. 2019). This calibration was done to help visualize the data  
516 as the subsequent Mantel test did not require an ultrametric tree. Lastly, to test if pairwise  
517 phylogenetic distance covaries with pairwise synteny values, we conducted a Mantel test.

518

#### 519 **Data availability**

520 Assembly available at <https://www.dnazoo.org/>

521 Supplemental Information available on Dryad [link pending submission]

522 Sequencing data from this project are archived on the SRA under accession #####  
523 [embargoed until 2021-11-01 or publication].

524

## 525 **Acknowledgments**

526 We would like to thank the Ruth Tawan-tawan, Ceso II of the Philippines' Department of  
527 Environment and Natural Resources Region XI for help with the Gratuitous and export permits.  
528 We would also like to thank the University of Mindanao for the mobility support, and Milton N.  
529 Medina and Chrestine Torrejos of U.M. for help collecting specimens. We would like to thank  
530 Zane Colaric of B.C.M., for the help loading the QC library runs. We would also like to thank  
531 Sarah Crews of C.A.S. for help with the manuscript text. We were funded in part through  
532 NSF:DEB award number 1856402 made to MHVD.

533

## 534 **Figure Legends**

535

536 **Figure 1.** *Pachyrhynchus sulphureomaculatus*, lateral habitus. (Photo by A. Cabras)

537

538 **Figure 2.** Hi-C contact map heatmap of *Pachyrhynchus sulphureomaculatus* Schultze, 1922.

539 Eleven chromosome boundaries are indicated by black lines. Heatmap scale lower left, range in  
540 counts of mapped Hi-C reads per megabase squared. Rabl-like pattern highlighted along  
541 chromosome 1, top row, open triangles indicate contact between centromere regions. X-like  
542 pattern between adjacent off diagonal regions indicative of contact between distal portions of  
543 chromosomes.

544

545 **Figure 3.** *P. sulphureomaculatus* scaffold bubble plot of coverage versus GC content. Scaffolds  
546 included are from the unfiltered assembly. Taxonomic annotation provided via *blastn* alignment  
547 to the NCBI nt database.

548

549 **Figure 4.** Stacked bar plot of Insecta BUSCO gene sets by category for chromosome-level beetle  
550 genomes. Y-axis is the percent of BUSCO genes, X-axis labels are the genus names. The  
551 abbreviations in the legend are: D=duplicated, F=fragmented, M=missing and S=single.

552

553 **Figure 5.** Histogram of repeat content for weevil genomes.

554

555 **Figure 6.** Heat map of gene density and non-repetitive DNA per 1 Mb sliding window. The 11  
556 chromosomes are in the same order as in the Hi-C heat map (Fig. 1) and fasta file.

557

558 **Figure 7.** Chronogram and ideograms of the 5 beetle genomes which have chromosome level  
559 assemblies.

560

561 **Figure 8.** Stacked bar plots and chromosome mappings of BUSCO genes' placements. Colors  
562 correspond to *P. sulphureomaculatus* chromosomes. The numbering scheme of chromosomes  
563 matches the names found in the genome's fasta file.

564

565 **Figure 9.** Insecta, gene order conservation score (GOC) plot. Left panel, chronogram, branches  
566 colored by order. Heat map of normalized pairwise GOC scores, redder boxes indicate more

567 synteny between pairs. Right panel, within order normalized pairwise GOC score versus  
568 phylogenetic distance.

569  
570  
571  
572  
573  
574

## TABLES

|                                                  |
|--------------------------------------------------|
| Inter-chromosomal: 56,711,177 (24.85% / 38.63%)  |
| Intra-chromosomal: 23,941,704 (10.49% / 16.31%)  |
| Short Range (<20Kb): 18,227,329 (7.99% / 12.42%) |
| Long Range (>20Kb): 5,714,353 (2.50% / 3.89%)    |

575  
576 **Table 1.** Summary of Hi-C reads mapped.

577  
578  
579  
580  
581  
582

|                                        |               |
|----------------------------------------|---------------|
| Number of scaffolds                    | 4,093         |
| Total size of scaffolds                | 2,051,389,195 |
| Number of contigs                      | 14,365        |
| Number of contigs in scaffolds         | 10,283        |
| Number of contigs not in scaffolds     | 4,082         |
| Mean scaffold size                     | 501,195       |
| Median scaffold size                   | 8,175         |
| N50 scaffold length                    | 215,921,627   |
| scaffold %AT                           | 33.11         |
| scaffold %CG                           | 16.87         |
| scaffold %N                            | 0.05          |
| <b>% bp of assembly in chromosomes</b> | <b>97.52</b>  |

583  
584 **Table 2.** Summary statistics for final assembly.

585

586  
587  
588  
589  
590  
591

| Chromosome | length bp   | # of contigs | number of N's (runs of 100) | percent N's in chromo. | N50    | N50 reached in # of contigs |
|------------|-------------|--------------|-----------------------------|------------------------|--------|-----------------------------|
| Chr_1      | 263,832,947 | 1388         | 138,700                     | 0.05%                  | 287319 | 280                         |
| Chr_2      | 253,284,860 | 1222         | 122,100                     | 0.04%                  | 326447 | 246                         |
| Chr_3      | 137,890,936 | 683          | 68,200                      | 0.04%                  | 315991 | 127                         |
| Chr_4      | 223,502,247 | 1131         | 113,000                     | 0.05%                  | 297265 | 217                         |
| Chr_5      | 69,931,891  | 236          | 23,500                      | 0.03%                  | 452330 | 50                          |
| Chr_6      | 125,299,487 | 655          | 65,400                      | 0.05%                  | 304080 | 131                         |
| Chr_7      | 132,078,125 | 624          | 62,300                      | 0.04%                  | 368684 | 112                         |
| Chr_8      | 173,282,956 | 836          | 83,500                      | 0.04%                  | 335626 | 165                         |
| Chr_9      | 215,921,627 | 1221         | 122,000                     | 0.05%                  | 280522 | 237                         |
| Chr_10     | 186,927,849 | 988          | 98,700                      | 0.05%                  | 290475 | 197                         |
| Chr_11     | 218,628,933 | 1074         | 107,300                     | 0.04%                  | 316887 | 219                         |

592  
593  
594  
595  
596  
597  
598

**Table 3.** Summary statistics for final assembly by chromosome.

## REFERENCES

- 599 Ahola V, Lehtonen R, Somervuo P, Salmela L, Koskinen P, Rastas P, Välimäki N, Paulin  
600 L, Kvist J, Wahlberg N, et al. 2014. The Glanville fritillary genome retains an  
601 ancient karyotype and reveals selective chromosomal fusions in Lepidoptera.  
602 *Nature Communications* 2014;5 doi: 10.1038/ncomms5737. Article 4737
- 603 Alonso-Zarazaga MA and Lyal CHC. 1999. *A World Catalogue of Families and Genera*  
604 *of Curculionoidea (Insecta: Coleoptera). (Excepting Scolytidae and*  
605 *Platypodidae)*. 124 pp. Entomopraxis, Barcelona.

- 606 Anbutsu H, Moriyama M, Nikoh N, Hosokawa T, Futahashi R, Tanahashi M, Meng XY,  
607 Kuriwada T, Mori N, Oshima K, Hattori M. 2017. Small genome symbiont  
608 underlies cuticle hardness in beetles. *Proceedings of the National Academy of*  
609 *Sciences* 114:E8382-E8391.
- 610 Arensburger P, Megy K, Waterhouse RM, Abrudan J, Amedeo P, Antelo B, Bartholomay L,  
611 Bidwell S, Caler E, Camara F, et al. 2010. Sequencing of *Culex quinquefasciatus*  
612 establishes a platform for mosquito comparative genomics. *Science*. 330(6000):86-8.  
613 doi:10.1126/science.1191864.
- 614 Belton JM, McCord RP, Gibcus JH, Naumova N, Zhan Y, Dekker J. 2012. Hi-C: a  
615 comprehensive technique to capture the conformation of genomes. *Methods*  
616 58:268-276.
- 617 Biello R, Singh A, Godfrey CJ, Fernández FF, Mugford ST, Powell G, Hogenhout SA,  
618 Mathers TC. 2020. A chromosome level genome assembly of the woolly apple  
619 aphid, *Eriosoma lanigerum* Hausmann (Hemiptera: Aphididae). *Molecular*  
620 *Ecology Resources* 00: 1-11. <https://doi.org/10.1111/1755-0998.13258>
- 621 Bracewell R, Chatla K, Nalley MJ, Bachtrog D. 2019. Dynamic turnover of centromeres  
622 drives karyotype evolution in *Drosophila*. *eLife* 2019;8:e49002.
- 623 Brown RM and Siler CD. 2014. Spotted stream frog diversification at the Australasian  
624 faunal zone interface, mainland versus island comparisons, and a test of the  
625 Philippine ‘dual-umbilicus’ hypothesis. *Journal of Biogeography*. 41:182-195.
- 626 Bushmanova E, Antipov D, Lapidus A, Prjibelski AD. 2019. rnaSPAdes: a *de novo*  
627 transcriptome assembler and its application to RNA-Seq data. *GigaScience*.  
628 8:giz100, <https://doi.org/10.1093/gigascience/giz100>  
629
- 630 Campbell MA, Haas BJ, Hamilton JP, Mount SM, Buell CR. 2006. Comprehensive  
631 analysis of alternative splicing in rice and comparative analyses with Arabidopsis.  
632 *BMC Genomics* 2006, 7:327 <http://www.biomedcentral.com/1471-2164/7/327>
- 633 Chen S, Zhou Y, Chen Y, Gu J. 2018. fastp: an ultra-fast all-in-one FASTQ preprocessor.  
634 *Bioinformatics* 34:884-890. doi: 10.1093/bioinformatics/bty560
- 635 Capella-Gutierrez S, Silla-Martinez JM, Gabaldon T. 2009. trimAl: a tool for automated  
636 alignment trimming in large-scale phylogenetic analyses. *Bioinformatics* 25:1972-  
637 1973.
- 638 Camacho C, Coulouris G, Avagyan V, Ma N, Papadopoulos J, Bealer K, Madden TL.  
639 2008. BLAST+: architecture and applications. *BMC Bioinformatics* 10:421.  
640
- 641 Cabras A, Coritico F, Mohagan A, Rukname A. 2017. Pachyrhynchini of Mt. Kiamo,  
642 Malaybalay, Bukidnon, Mindanao Island. *Journal of Entomology and Zoology*  
643 *Studies*. 5(3):979-983.  
644



- 645 Csink AK and Henikoff S. 1998. Large-scale chromosomal movements during interphase  
646 progression in *Drosophila*. *J. Cell Biol.* 143:13-22.  
647
- 648 Chowdhary BP, Raudsepp T, Frönicke L, Scherthan H. 1998. Emerging Patterns of  
649 Comparative Genome Organization in Some Mammalian Species as Revealed  
650 by Zoo-FISH. *Genome Res.* 8:577-589. doi:10.1101/gr.8.6.577  
651
- 652 Ceja-Navarro JA, Karaoz U, Bill M, Hao Z, White RA 3rd, Arellano A, Ramanculova L,  
653 Filley TR, Berry TD, Conrad ME, et al. 2019. Gut anatomical development and  
654 microbial functional assembly promote lignocellulose deconstruction and colony  
655 subsistence of a wood-feeding beetle. *Nat. Microbiol.* 4:864-75.  
656
- 657 Concia L, Veluchamy A, Ramirez-Prado JS, Martin-Ramirez A, Huang Y, Perez M,  
658 Domenichini S, Rodriguez Granados NY, Kim S, Blein T, Duncan S, et al. Wheat  
659 chromatin architecture is organized in genome territories and transcription  
660 factories. *Genome Biol.* 21(1):104. doi: 10.1186/s13059-020-01998-1.  
661
- 662 Cowan CR, Carlton PM, Cande WZ. 2001. The Polar Arrangement of Telomeres in  
663 Interphase and Meiosis. Rabl Organization and the Bouquet. *Plant Physiology*  
664 125(2):532-538. DOI: 10.1104/pp.125.2.532  
665
- 666 Davey JW, Chouteau M, Barker SL, Maroja L, Baxter SW, Simpson F, Merrill RM,  
667 Joron M, Mallet J, Dasmahapatra KK, Jiggins CD. 2016. Major Improvements to  
668 the *Heliconius melpomene* Genome Assembly Used to Confirm 10 Chromosome  
669 Fusion Events in 6 Million Years of Butterfly Evolution. *G3 (Bethesda)* 6(3):695-  
670 708.  
671
- 672 Deakin JE. 2018. Chromosome Evolution in Marsupials. *Genes.* 9: 72.  
673
- 674 Dudchenko O, Batra SS, Omer AD, Nyquist SK, Hoeger M, Durand NC, Shamim MS,  
675 Machol I, Lander ES, Aiden AP, Aiden EL. 2017. De novo assembly of the *Aedes*  
676 *aegypti* genome using Hi-C yields chromosome-length scaffolds. *Science* 356:92-  
677 95. <https://doi.org/10.1126/science.aal3327>.  
678
- 679 Dudchenko O, Shamim MS, Batra S, Durand NC, Musial NT, Mostofa R, Pham M, et  
680 al. 2018. The Juicebox Assembly Tools Module Facilitates de Novo Assembly of  
681 Mammalian Genomes with Chromosome-Length Scaffolds for under  
682 \$1000. *bioRxiv*, January, 254797. <https://doi.org/10.1101/254797>  
683
- 684 Durand NC, Shamim MS, Machol I, Rao SS, Huntley MH, Lander ES, Aiden EL. 2016.  
685 Juicer Provides a One-Click System for Analyzing Loop-Resolution Hi-C  
686 Experiments. *Cell Syst.* 3(1):95-8. doi:10.1016/j.cels.2016.07.002.  
687
- 688 Eagen KP, Aiden EL, Kornberg RD. 2017. Polycomb-mediated chromatin loops revealed  
689 by a subkilobase-resolution chromatin interaction map. *Proc. Natl. Acad. Sci.*  
690 114:8764-8769.

- 691  
692 Fallon TR, Lower SE, Chang CH, Bessho-Uehara M, Martin GJ, Bewick AJ, Behringer  
693 M, Debat HJ, Wong I, Day JC, et al. 2018. Firefly genomes illuminate parallel  
694 origins of bioluminescence in beetles. *eLife*. 2018;7:e36495. pmid:30324905  
695
- 696 Ghurye J, Pop M, Koren S, Bickhart D, Chin CS. 2017. Scaffolding of long-read assemblies  
697 using long range contact information. *BMC genomics*. 18(1):527.  
698
- 699 Ghurye J, Rhie A, Walenz BP, Schmitt A, Selvaraj S, Pop M, Phillippy AM, Koren S.  
700 Integrating Hi-C links with assembly graphs for chromosome-scale assembly. 2019.  
701 *PLoS Comput Biol*. 15(8):e1007273. doi:10.1371/journal.pcbi.1007273.  
702
- 703 Grabherr MG, Haas BJ, Yassour M, Levin JZ, Thompson DA, Amit I, Adiconis X, Fan  
704 L, Raychowdhury R, Zeng Q, et al. 2011. Full-length transcriptome assembly  
705 from RNA-Seq data without a reference genome. *Nat Biotechnol*. 29(7):644-52.  
706 doi: 10.1038/nbt.1883.  
707
- 708 Goto B, Okazaki K, Niwa O. 2001. Cytoplasmic microtubular system implicated in de  
709 novo formation of a Rab1-like orientation of chromosomes in fission yeast. *J Cell*  
710 *Sci*. 114:2427-35.  
711
- 712 Haas BJ, Papanicolaou A, Yassour M, Grabherr M, Philip D, Bowden J, Couger MB,  
713 Eccles D, Li B, Macmanes MD, Ott M, Orvis J, Pochet N: *Reference Generation*  
714 *and Analysis with Trinity. Volume 8*; 2014.  
715
- 716 Haas BJ. 2008. Analysis of Alternative Splicing in Plants with Bioinformatics Tools.  
717 Nuclear pre-mRNA Processing in Plants.
- 718 Haas BJ, Salzberg SL, Zhu W, Pertea M, Allen JE, Orvis J, White O, Buell CR, Wortman  
719 JR. 2008. Automated eukaryotic gene structure annotation using  
720 EVIDENCEModeler and the Program to Assemble Spliced Alignments. *Genome*  
721 *Biol*. 9(1):R7. doi: 10.1186/gb-2008-9-1-r7.  
722
- 723 Hammond PM. 1992. Species inventory. Global Biodiversity. Status of the Earth's  
724 Living Resources. A Report Compiled by the World Conservation Monitoring  
725 Centre, ed Groombridge B (Chapman and Hall, London), pp 17-39.  
726
- 727 Hao Z, Lv D, Ge Y, Shi J, Weijers D, Yu G, Chen J. 2020. RIdeogram: drawing SVG  
728 graphics to visualize and map genome-wide data on the ideograms. *PeerJ Comput.*  
729 *Sci*. 6:e251 <http://doi.org/10.7717/peerj-cs.251>  
730
- 731 Harrop T, Le Lec MF, Jauregui R, Taylor SE, Inwood SN, van Stijn T, Henry H, Skelly  
732 J, Ganesh S, Ashby RL, Jacobs J, Goldson SL, Dearden PK. 2020. Genetic  
733 Diversity in Invasive Populations of Argentine Stem Weevil Associated with  
734 Adaptation to Biocontrol. *Insects*, 11(7), 441.  
735 <https://doi.org/10.3390/insects11070441>

- 736  
737 Heaney LR, 1985. Zoogeographic evidence for middle and late pleistocene land bridges  
738 to the philippine islands. *Mod Quatern Res SE Asia* 9:127-144.  
739
- 740 Hill J, Rastas P, Hornett EA, Neethiraj R, Clark N, Morehouse N, de la Paz Celorio-  
741 Mancera M, Cols JC, Dircksen H, Meslin C, et al., 2019. Unprecedented  
742 reorganization of holocentric chromosomes provides insights into the enigma of  
743 lepidopteran chromosome evolution. *Sci. Adv.* 5:1-13.  
744
- 745 Edelman NB, Frandsen PB, Miyagi M, Clavijo B, Davey J, Dikow R, García-Accinelli G,  
746 Van Belleghem SM, Patterson N, Neafsey DE, et al. Genomic architecture and  
747 introgression shape a butterfly radiation. 2019. *Science*. 366(6465):594-599. doi:  
748 10.1126/science.aaw2090  
749
- 750 Herndon N, Shelton J, Gerischer L, Ioannidis P, Ninova M, Dönitz J, Waterhouse RM,  
751 Liang C, Damm C, Siemanowski J, et al. 2020. Enhanced genome assembly and  
752 a new official gene set for *Tribolium castaneum*. *BMC Genomics*. 21(1):47. doi:  
753 10.1186/s12864-019-6394-6.  
754
- 755 Hoff KJ, Lomsadze A, Borodovsky M, Stanke M. 2019. Whole-Genome Annotation with  
756 BRAKER. *Methods Mol Biol*. 1962:65-95. doi:10.1007/978-1-4939-9173-0\_5  
757
- 758 Hsu CF, Tseng HY, Hsiao Y, Ko CC. 2017. First record of the host plant and larvae of  
759 *Pachyrhynchus sonani* (Coleoptera: Curculionidae) on Lanyu Island, Taiwan.  
760 *Entomological Science*, 20:288-291. doi: 10.1111/ens.12262.  
761
- 762 Idziak D, Robaszkiewicz E, Hasterok R. 2015. Spatial distribution of centromeres and  
763 telomeres at interphase varies among Brachypodium species. *Journal of*  
764 *Experimental Botany*. 66(21): 6623–6634. <https://doi.org/10.1093/jxb/erv369>  
765
- 766 Inger RF, 1954. Systematics and zoogeography of Philippine Amphibia. *Fieldiana*  
767 33:182-531.  
768
- 769 Jin Q, Trelles-Sticken E, Scherthan H, Loidl J. 1998. Yeast nuclei display prominent  
770 centromere clustering that is reduced in nondividing cells and in meiotic  
771 prophase. *The Journal of Cell Biology* 141:21-29.  
772
- 773 Kingan SB, Urban J, Lambert CC, Baybayan P, Childers AK, Coates B, Scheffler B,  
774 Hackett K, Korlach J, Geib SM. 2019. A high-quality genome assembly from a  
775 single, field-collected spotted lanternfly (*Lycorma delicatula*) using the PacBio  
776 Sequel II system. *GigaScience*, 8(10): giz122,  
777 <https://doi.org/10.1093/gigascience/giz122>  
778
- 779 Kemkemer C, Kohn M, Cooper DN, Froenicke L, Högel J, Hameister H, Kehrer-  
780 Sawatzki H. 2009. Gene synteny comparisons between different vertebrates  
781 provide new insights into breakage and fusion events during mammalian

- 782 karyotype evolution. *BMC evolutionary biology*, 9, 84.  
783 <https://doi.org/10.1186/1471-2148-9-84>  
784
- 785 Kent WJ. 2002. BLAT—The BLAST-Like Alignment Tool. *Genome Research* 12:656-  
786 664. DOI: 10.1101/gr.229202.  
787
- 788 Kent WJ. 2012. BLAT—The BLAST-Like Alignment Tool. Version 35. Available at  
789 <https://users.soe.ucsc.edu/~kent>.  
790
- 791 Kim D, Pertea G, Trapnell C, Pimentel H, Kelley R, Salzberg SL. 2013. TopHat2:  
792 accurate alignment of transcriptomes in the presence of insertions, deletions and  
793 gene fusions. *Genome Biology* 14:R36 (2013). [https://doi.org/10.1186/gb-2013-](https://doi.org/10.1186/gb-2013-14-4-r36)  
794 14-4-r36.  
795
- 796 Kim D, Paggi JM, Park C, Bennett C, Salzberg SL. 2019. Graph-based genome  
797 alignment and genotyping with HISAT2 and HISAT-genotype. *Nat Biotechnol*.  
798 37(8):907-915. doi: 10.1038/s41587-019-0201-4.  
799
- 800 Kim S, Liachko I, Brickner DG, Cook K, Noble WS, Brickner JH, Shendure J, Dunham  
801 MJ. 2017. The dynamic three-dimensional organization of the diploid yeast  
802 genome. *eLife* 2017;6:e23623 DOI: [10.7554/eLife.23623](https://doi.org/10.7554/eLife.23623)  
803
- 804 Kingan SB, Heaton H, Cudini J, Holroyd N, Tracey A, Lambert CC, Baybayan P, Galvin  
805 B, Korlach J, Berriman M, Lawniczak, MKN. 2019. A Low DNA Input Protocol  
806 for High-quality PacBio De Novo Genome Assemblies from Single Invertebrate  
807 Individuals. [https://www.pacb.com/proceedings/a-low-dna-input-protocol-for-](https://www.pacb.com/proceedings/a-low-dna-input-protocol-for-high-quality-pacbio-de-novo-genome-assemblies-from-single-invertebrate-individuals/)  
808 [high-quality-pacbio-de-novo-genome-assemblies-from-single-invertebrate-](https://www.pacb.com/proceedings/a-low-dna-input-protocol-for-high-quality-pacbio-de-novo-genome-assemblies-from-single-invertebrate-individuals/)  
809 [individuals/](https://www.pacb.com/proceedings/a-low-dna-input-protocol-for-high-quality-pacbio-de-novo-genome-assemblies-from-single-invertebrate-individuals/)  
810
- 811 Li H. 2018. Minimap2: pairwise alignment for nucleotide sequences, *Bioinformatics*,  
812 34(18):3094-3100. <https://doi.org/10.1093/bioinformatics/bty191>  
813
- 814 Liao Y, Zhang X, Chakraborty M, Emerson JJ. 2020. Topologically associating domains  
815 and their role in the evolution of genome structure and function in *Drosophila*  
816 bioRxiv 2020.05.13.094516; doi: <https://doi.org/10.1101/2020.05.13.094516>  
817
- 818 Lieberman-Aiden E, van Berkum NL, Williams L, Imakaev M, Ragoczy T, Telling A,  
819 Amit I, Lajoie BR, Sabo PJ, Dorschner MO, Sandstrom R, et al. 2009.  
820 Comprehensive mapping of long-range interactions reveals folding principles of  
821 the human genome. *Science* 326:289-293.  
822
- 823 Liu Q, Guo Y, Zhang Y, Hu W, Li Y, Zhu D, Zhou Z, Wu J, Chen N, Zhou X-N. 2019. A  
824 chromosomal-level genome assembly for the insect vector for Chagas disease,  
825 *Triatoma rubrofasciata*. *GigaScience*, 8(8): giz089  
826 <https://doi.org/10.1093/gigascience/giz089>  
827

- 828 Lu S, Yang J, Dai X, Xie F, He J, Dong Z, Mao J, Liu G, Chang Z, Zhao R, Wan W,  
829 Zhang R, Li Y, Wang W, Li X. 2019. Chromosomal-level reference genome of  
830 Chinese peacock butterfly (*Papilio bianor*) based on third-generation DNA  
831 sequencing and Hi-C analysis. *GigaScience*, 8(11):giz128  
832 <https://doi.org/10.1093/gigascience/giz128>  
833
- 834 Lukyanchikova V, Nuriddinov M, Belokopytova P, Liang J, Reijnders MJMF, Ruzzante  
835 L, Waterhouse RM, Tu Z, Sharakhov IV, Fishman V. 2020. *Anopheles*  
836 *mosquitoes* revealed new principles of 3D genome organization in insects.  
837 bioRxiv 2020.05.26.114017; doi: <https://doi.org/10.1101/2020.05.26.114017>  
838
- 839 Lukhtanov VA, Dincă V, Friberg M, Šichová J, Olofsson M, Vila R, Marec F, Wiklund  
840 C. 2018. Versatility of multivalent orientation, inverted meiosis, and rescued  
841 fitness in holocentric chromosomal hybrids. *Proc Natl Acad Sci*. 115(41):E9610-  
842 E9619.  
843
- 844 Mascher M, Gundlach H, Himmelbach A, Beier S, Twardziok SO, Wicker T, Radchuk V,  
845 Dockter C, Hedley PE, Russell J, Bayer M, et al. 2017. A chromosome  
846 conformation capture ordered sequence of the barley genome. *Nature*  
847 544(7651):427-433. <https://doi.org/10.1038/nature22043>.  
848
- 849 Marec F, Tothova A, Sahara K, Traut W. 2001. Meiotic pairing of sex chromosome  
850 fragments and its relation to atypical transmission of a sex-linked marker in  
851 *Ephestia kuehniella* (Insecta: Lepidoptera). *Heredity*. 87:659–671.  
852
- 853 McKenna D.D., Sequeira A.S., Marvaldi A.E., Farrell B.D. 2009. Temporal lags and  
854 overlap in the diversification of weevils and flowering plants. *Proceedings of the*  
855 *National Academy of Sciences*. 106:7083-7088.  
856
- 857 McKenna DD, Shin S, Ahrens D, Balke M, Beza-Beza C, Clarke DJ, Donath A, Escalona  
858 HE, Friedrich F, Letsch H, et al. 2019. The evolution and genome basis of beetle  
859 diversity. *Proceedings of the National Academy of Sciences* 116(49):24729-  
860 24737.  
861
- 862 Mathers TC, Wouters RHM, Mugford ST, Swarbreck D, van Oosterhout C, Hogenhout  
863 SA. 2020. Chromosome-scale genome assemblies of aphids reveal extensively  
864 rearranged autosomes and long-term conservation of the X chromosome.  
865 BioRxiv. doi: 10.1101/2020.03.24.006411  
866
- 867 Matthews BJ, Dudchenko O, Kingan SB, Koren S, Antoshechkin I, Crawford JE, Glassford WJ,  
868 Herre M, Redmond SN, Rose NH, et al. 2018. Improved reference genome of *Aedes*  
869 *aegypti* informs arbovirus vector control. *Nature*. 563(7732):501-507. doi:  
870 10.1038/s41586-018-0692-z.  
871
- 872 Mesquita RD, Vionette-Amaral RJ, Lowenberger C, Rivera-Pomar R, Monteiro FA, Minx P,  
873 Spieth J, Carvalho AB, Panzera F, Lawson D, et al. 2015. Genome of *Rhodnius prolixus*,

- 874 an insect vector of Chagas disease, reveals unique adaptations to hematophagy and  
875 parasite infection. *Proceedings of the National Academy of Sciences*. 112(48):14936-  
876 14941. DOI: 10.1073/pnas.1506226112  
877
- 878 Misof B, Liu S, Meusemann K, Peters RS, Donath A, Mayer C, Frandsen PB, Ware J,  
879 Flouri T, Beutel RG, et al. 2014. Phylogenomics resolves the timing and pattern  
880 of insect evolution. *Science*. 346:763-767.  
881
- 882 Mizuguchi T, Barrowman J, Grewal SIS. 2015. Chromosome domain architecture and  
883 dynamic organization of the fission yeast genome. *FEBS Letters*. 589, doi:  
884 10.1016/j.febslet.2015.06.008
- 885 Oberprieler RG. 2010. A reclassification of the weevil subfamily Cyclominae  
886 (Coleoptera: Curculionidae). *Zootaxa* 2515:1-35.
- 887 Obbard DJ, Maclennan J, Kim K-W, Rambaut A, O'Grady PM, Jiggins FM. 2012.  
888 Estimating Divergence Dates and Substitution Rates in the *Drosophila*  
889 Phylogeny. *Molecular Biology and Evolution*, 29(11): 3459–3473.  
890 <https://doi.org/10.1093/molbev/mss150>  
891
- 892 Oberprieler RG, Marvaldi AE, Anderson RS. 2007. Weevils, Weevils, Weevils  
893 Everywhere. *Zootaxa* 1668: 491-520. In Zhang, Z.-Q. and Shear, W.A. (eds.)  
894 (2007) Linnaeus Tercentenary: Progress in Invertebrate Taxonomy. *Zootaxa*  
895 1668:1-766.
- 896 Paradis E, Schliep K. 2019. ape 5.0: an environment for modern phylogenetics and  
897 evolutionary analyses in R. *Bioinformatics* 35:526-528.
- 898 Pouokam M, Cruz B, Burgess S, Segal MR, Vazquez M, Arsuaga J. 2019. The Rabl  
899 configuration limits topological entanglement of chromosomes in budding yeast.  
900 *Scientific Reports* 9:1-10. <https://doi.org/10.1038/s41598-019-42967-4/>
- 901 Rao SS, Huntley MH, Durand NC, Stamenova EK, Bochkov ID, Robinson JT, Sanborn  
902 AL, Machol I, Omer AD, Lander ES, Aiden EL. 2014. A 3D Map of the Human  
903 Genome at Kilobase Resolution Reveals Principles of Chromatin Looping. *Cell*  
904 159:1665-1680.  
905
- 906 Renschler G, Richard G, Valsecchi CIK, Toscano S, Arrigoni L, Ramírez F, Akhtar A.  
907 2019. Hi-C guided assemblies reveal conserved regulatory topologies on X and  
908 autosomes despite extensive genome shuffling. *Genes Dev*. 33(21-22):1591-1612.  
909 doi: 10.1101/gad.328971.119.  
910
- 911 Rabl C. 1885. Ueber Zelltheilung Morphol Jahrbuch, 10:214-330  
912
- 913 Roach MJ, Schmidt SA, Borneman AR. 2018. Purge Haplotigs: allelic contig  
914 reassignment for third-gen diploid genome assemblies. *BMC Bioinformatics*  
915 19:460. <https://doi.org/10.1186/s12859-018-2485-7>

- 916  
917 Rukmane A. 2018. An annotated checklist of genus *Pachyrhynchus* (Coleoptera:  
918 Curculionidae: Pachyrhynchini). *Acta Biol. Univ. Daugavp.* 18 (1):63-68.  
919
- 920 SAMclip. <https://github.com/tseemann/samclip>. Accessed 1 May 2019  
921
- 922 Sanborn AL, Rao SSP, Huang S-C, Durand NC, Huntley MH, Jewett AI, Bochkov ID,  
923 Chinnappan D, Cutkosky A, Li J, Geeting KP, Gnirke A, Melnikov A, McKenna  
924 D, Stamenova EK, Lander ES, Aiden EL. 2015. Extrusion predicts 3D genome  
925 engineering results. *Proc. Natl Acad. Sci. USA.* 112(47):E6456-E6465. DOI:  
926 10.1073/pnas.1518552112  
927
- 928 Schneider C, Woehle C, Greve C, D’Haese CA, Wolf M, Janke A, Bálint M, Hüttel B.  
929 2020. Biodiversity genomics of small metazoans: high quality de novo genomes  
930 from single specimens of field-collected and ethanol-preserved springtails.  
931 bioRxiv 2020.08.10.244541; doi: <https://doi.org/10.1101/2020.08.10.244541>  
932
- 933 Schultze W. 1922. Beitrag zur coleopteren fauna der Philippinen. *Philippine Journal of*  
934 *Science* 21(6): 569-596.  
935
- 936 Schultze W. 1923. A monograph of the Pachyrrhynchid group of the Brachyderinae,  
937 Curculionidae: Part I. *Philippine Journal of Science* 23: 609-673.  
938
- 939 Sepey M, Ioannidis P, Emerson BC, Pitteloud C, Robinson-Rechavi M, Roux J,  
940 Escalona HE, McKenna DD, Misof B, Shin S, Zhou X, Waterhouse RM, Alvarez  
941 N. 2019. Genomic signatures accompanying the dietary shift to phytophagy in  
942 polyphagan beetles. *Genome Biol* 20, 98 [https://doi.org/10.1186/s13059-019-](https://doi.org/10.1186/s13059-019-1704-5)  
943 [1704-5](https://doi.org/10.1186/s13059-019-1704-5)  
944
- 945 Sheffer MM, Hoppe A, Krehenwinkel H, Uhl G, Kuss AW, Jensen L, Jensen C, Gillespie  
946 RG, Hoff KJ, Prost S. 2020 Chromosome-level reference genome of the European wasp  
947 spider *Argiope bruennichi*: a resource for studies on range expansion and evolutionary  
948 adaptation *bioRxiv* 2020.05.21.103564; doi: <https://doi.org/10.1101/2020.05.21.103564>  
949
- 950 Simão FA, Waterhouse RM, Ioannidis P, Kriventseva EV, Zdobnov EM. BUSCO:  
951 assessing genome assembly and annotation completeness with single-copy  
952 orthologs, *Bioinformatics*, 31(19):3210-3212.  
953 <https://doi.org/10.1093/bioinformatics/btv351>  
954
- 955 Simison BW, Parham JF, Papenfuss TJ, Lam AW, Henderson JB. 2020. An Annotated  
956 Chromosome-Level Reference Genome of the Red-Eared Slider Turtle  
957 (*Trachemys scripta elegans*). *Genome Biol Evol.* 12(4):456-462. doi:  
958 10.1093/gbe/evaa063.  
959
- 960 Smit AFA, Hubley R, Green P. 2015. *RepeatMasker Open-4.0*. 2015  
961 <http://www.repeatmasker.org>.

- 962  
963 Song C, Liu Y, Song A, Dong G, Zhao H, Sun W, Ramakrishnan S, Wang Y, Wang S, Li  
964 T, Niu Y, Jiang J, Dong B, Xia Y, Chen S, Hu Z, Chen F, Chen S. 2018. The  
965 *Chrysanthemum nankingense* genome provides insights into the evolution and  
966 diversification of chrysanthemum flowers and medicinal traits. *Mol Plant*.  
967 11(12):1482-1491. doi:10.1016/j.molp.2018.10.003  
968  
969 Stamatakis A. 2014. RAxML version 8: a tool for phylogenetic analysis and post-analysis  
970 of large phylogenies, *Bioinformatics*, 30:(9)1312-1313.  
971 <https://doi.org/10.1093/bioinformatics/btu033>  
972  
973 Stork NE, McBroom J, Gely C, Hamilton AJ. 2015. New approaches narrow global  
974 species estimates for beetles, insects and terrestrial arthropods. *Proc. Natl Acad.*  
975 *Sci. USA* 112, 7519–7523.  
976  
977 *Tribolium* Genome Sequencing Consortium, Richards S, Gibbs RA, Weinstock GM,  
978 Brown SJ, Denell R, Beeman RW, Gibbs R, Beeman RW, Brown SJ, et al. 2008.  
979 The genome of the model beetle and pest *Tribolium castaneum*. *Nature*.  
980 452(7190):949-55. doi: 10.1038/nature06784.  
981  
982 Tseng H-Y, Lin C-P, Hsu J-Y, Pike DA, Huang W-S 2014. The Functional Significance  
983 of Aposematic Signals: Geographic Variation in the Responses of Widespread  
984 Lizard Predators to Colourful Invertebrate Prey. *PLoS ONE* 9(3):e91777.  
985 doi:10.1371/journal.pone.0091777  
986  
987 Vaser R, Sović I, Nagarajan N, Šikić M. 2017. Fast and accurate de novo genome  
988 assembly from long uncorrected reads. *Genome Res*. 27(5):737-746.  
989 doi:10.1101/gr.214270.116  
990  
991 Van Belleghem SM, Vangestel C, De Wolf K, De Corte Z, Möst M, Rastas P, De  
992 Meester L, Hendrickx F. 2018. Evolution at two time frames: Polymorphisms  
993 from an ancient singular divergence event fuel contemporary parallel evolution.  
994 *PLoS Genet*. 14(11):e1007796. doi: 10.1371/journal.pgen.1007796.  
995  
996 Wang W, Guan R, Liu X, Zhang H, Song B, Xu Q, Fan G, Chen W, Wu X, Liu X, Wang  
997 J. 2019. Chromosome level comparative analysis of Brassica genomes. *Plant Mol*  
998 *Biol*. 99(3):237-249. doi: 10.1007/s11103-018-0814-x.  
999  
1000 Wu TD, Watanabe CK. 2005. GMAP: a genomic mapping and alignment program for  
1001 mRNA and EST sequences. *Bioinformatics*. 21(9):1859-1875.  
1002 <https://doi.org/10.1093/bioinformatics/bti310>  
1003  
1004 Yap SA, Gapud VP. 2007. Taxonomic review of the genus *Metapocyrtus* Heller  
1005 (Coleoptera: Curculionidae: Entiminae: Pachyrrhynchini). *Philip. Entomol.*  
1006 21:115-135.  
1007



1008 Yoshitake H. 2013. A New Genus and Two New Species of the Tribe Pachyrhynchini  
1009 (Coleoptera: Curculionidae) from Palawan Island, the Philippines. *Esakia*. 53:1-8.

1010

1011 Yoshitake H. 2018. A new genus and two new species of the tribe Pachyrhynchini  
1012 (Coleoptera, Curculionidae, Entiminae) from the Philippines. *Elytra* 8(1):5-14.

1013

1014 Zhang L, Li S, Luo J, Du P, Wu L, Li Y, Zhu X, Wang L, Zhang S, Cui J. 2020.  
1015 Chromosome-level genome assembly of the predator *Propylea japonica* to  
1016 understand its tolerance to insecticides and high temperatures. *Mol Ecol Resour.*  
1017 20: 292– 307. <https://doi.org/10.1111/1755-0998.13100>

1018

1019 Zhou Y, Liang Y, Yan Q, Zhang L, Chen D, Ruan L, Kong Y, Shi H, Chen M, Chen J.  
1020 2020. The draft genome of horseshoe crab *Tachypleus tridentatus* reveals its  
1021 evolutionary scenario and well developed innate immunity. *BMC Genomics*,  
1022 21(1):137-15. <http://doi.org/10.1186/s12864-020-6488-1>

1023

1024 Zimmerman EC. 1994. Australian weevils (Coleoptera: Curculionidae). Volume 1.  
1025 Orthoceri: Anthribidae to Attelabidae: the primitive weevils. East Melbourne:  
1026 CSIRO. pp. 741.

1027

1028

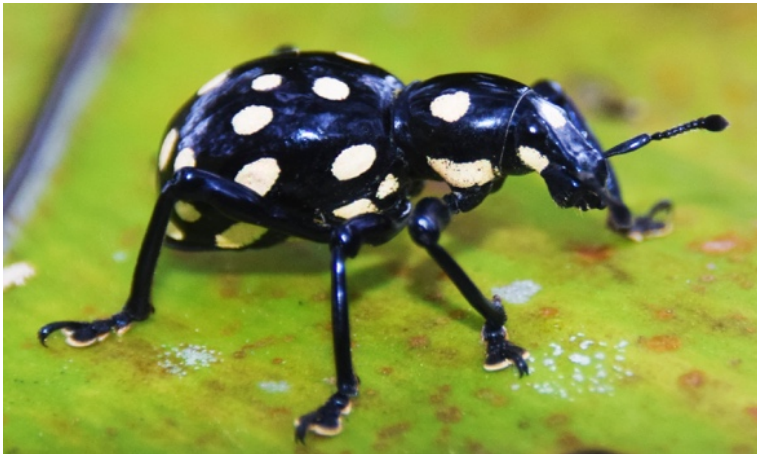

1029

1030

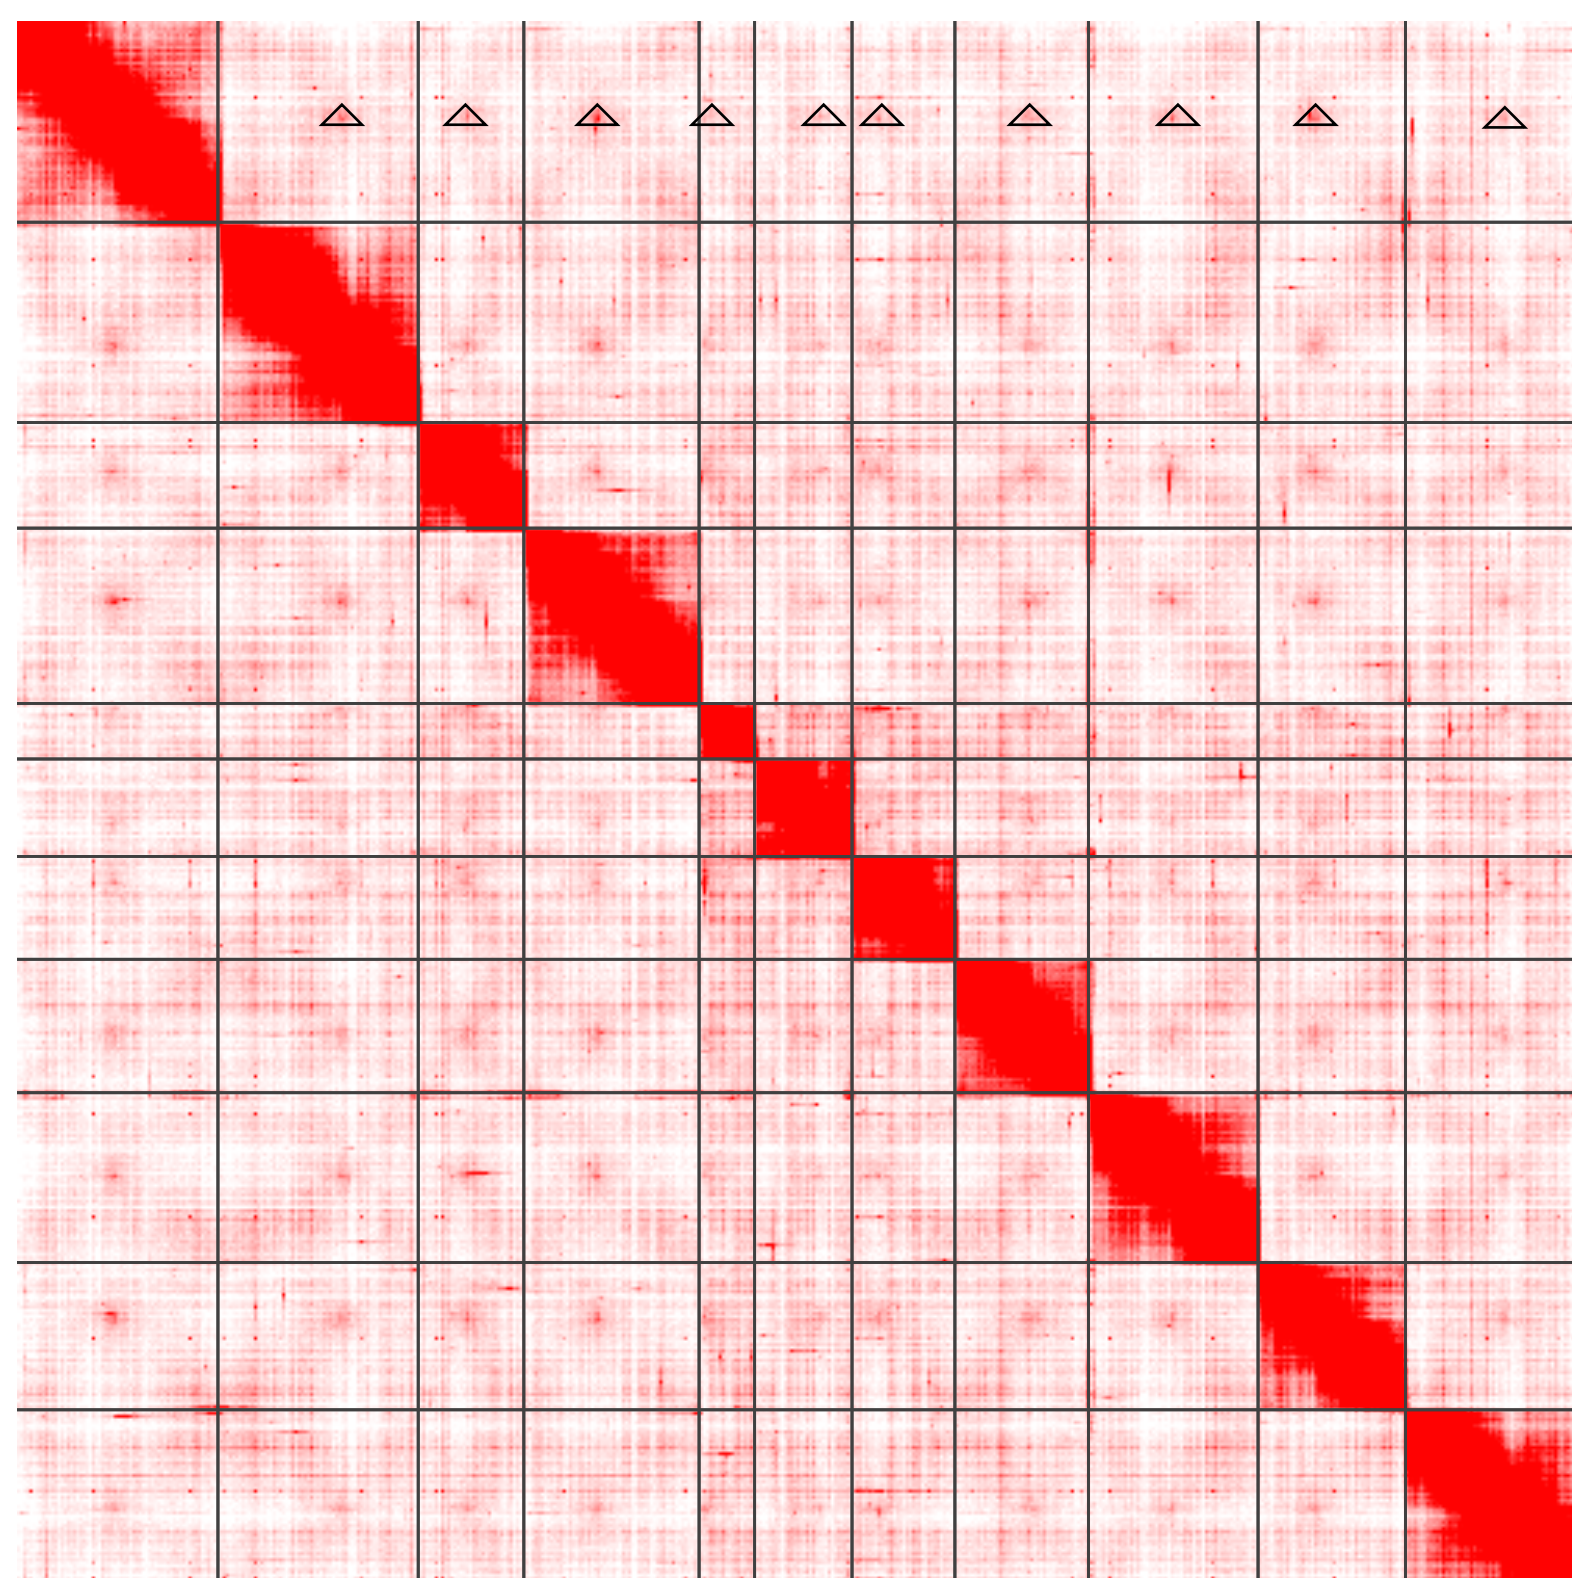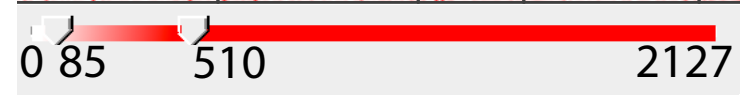

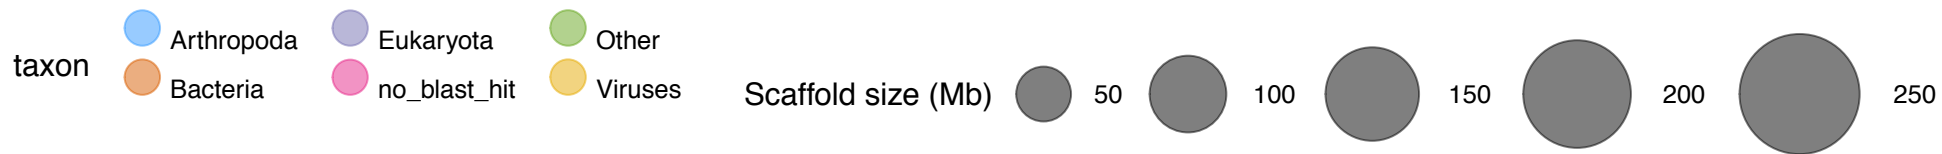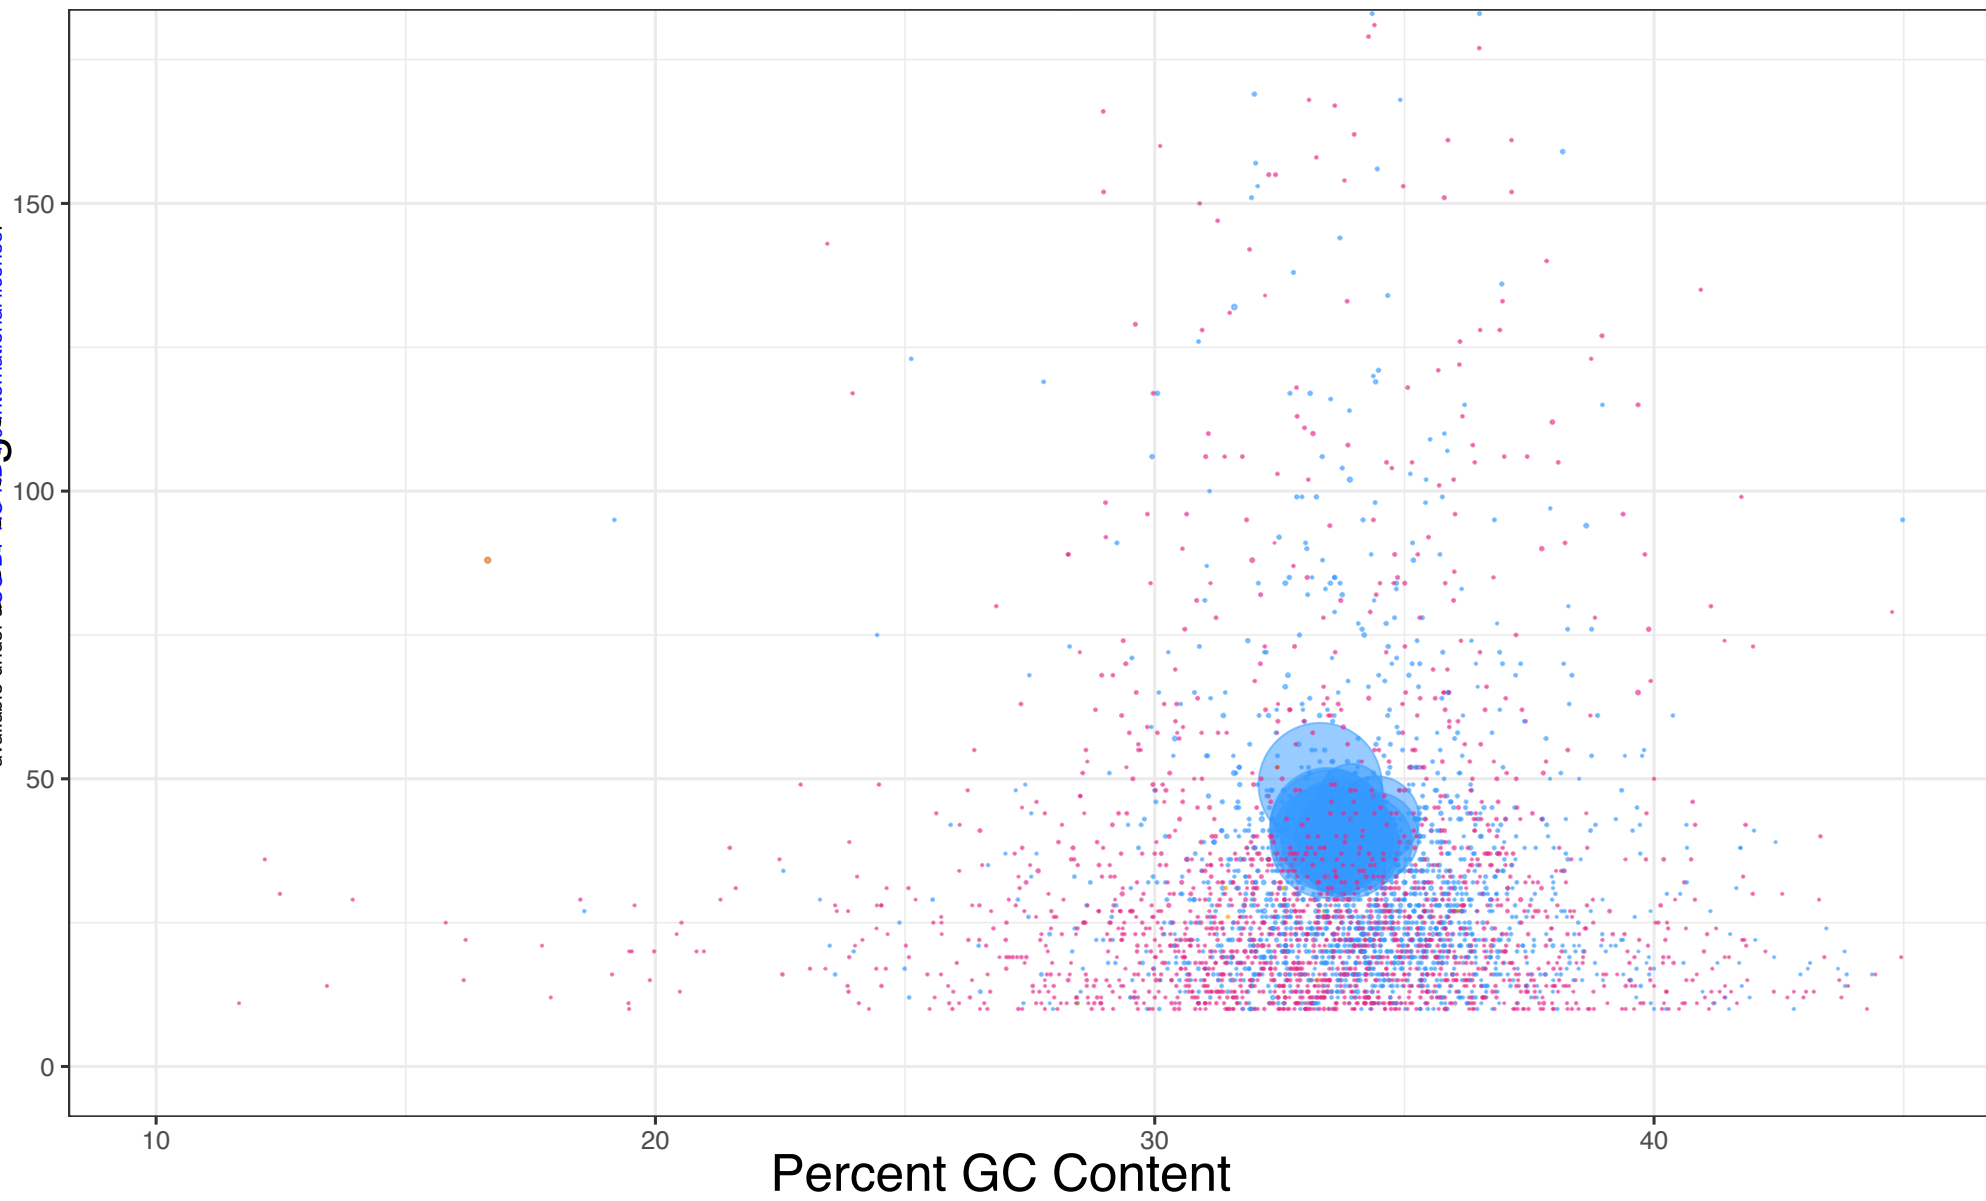

Insecta BUSCO\_V2

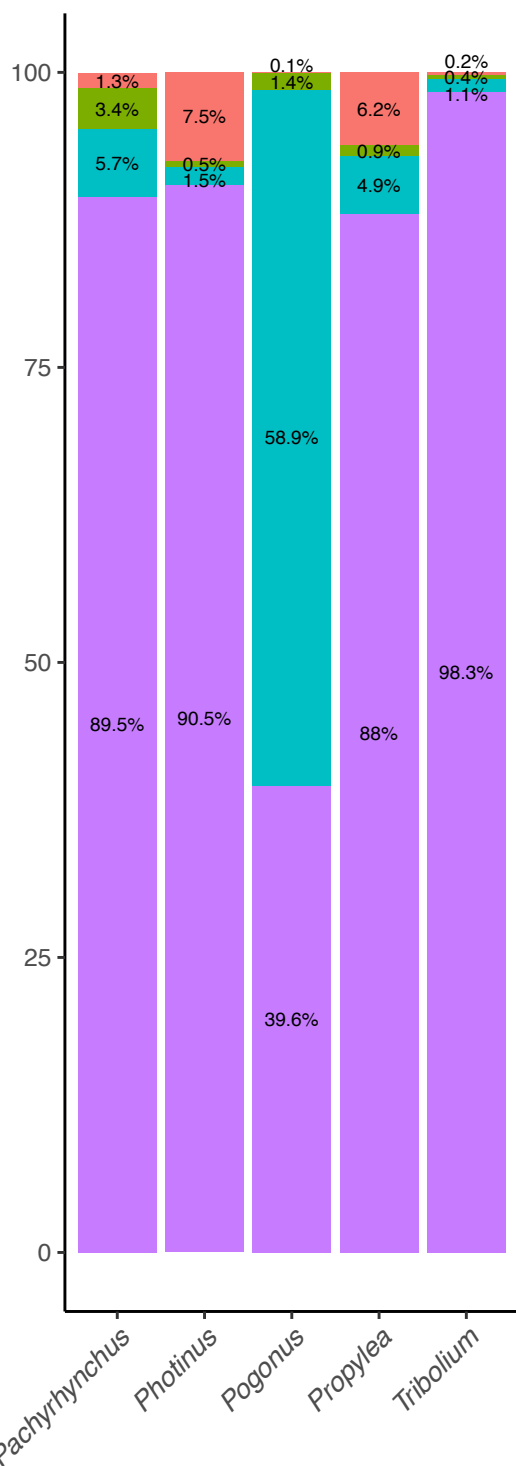

Insecta BUSCO\_V4

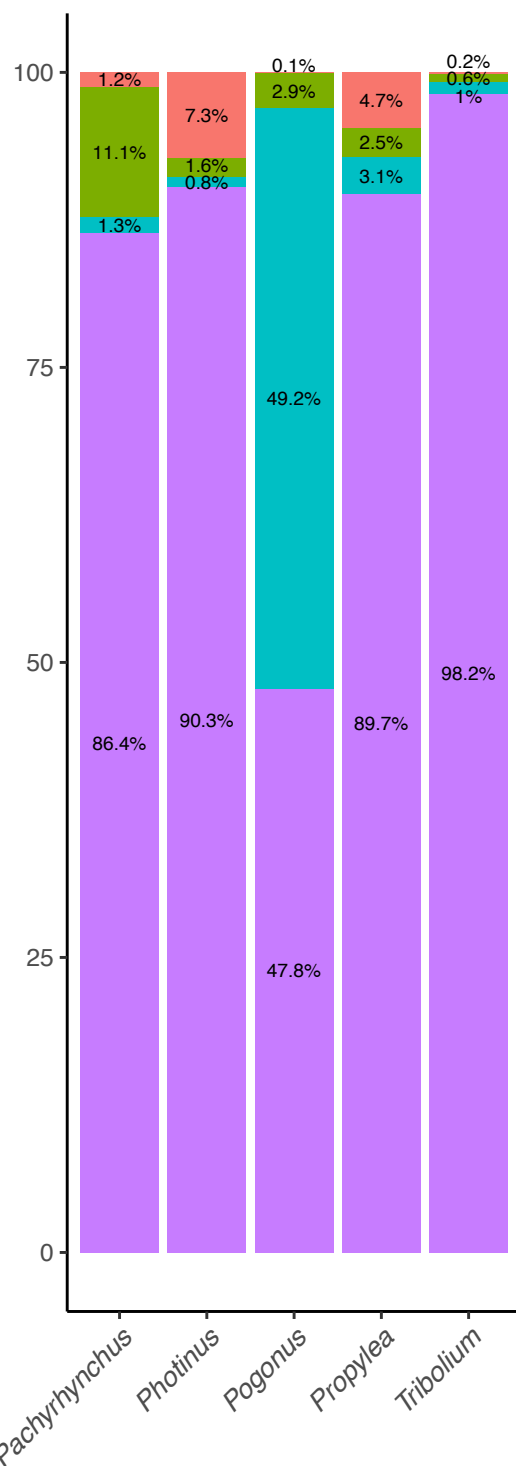

Insecta BUSCO\_V5

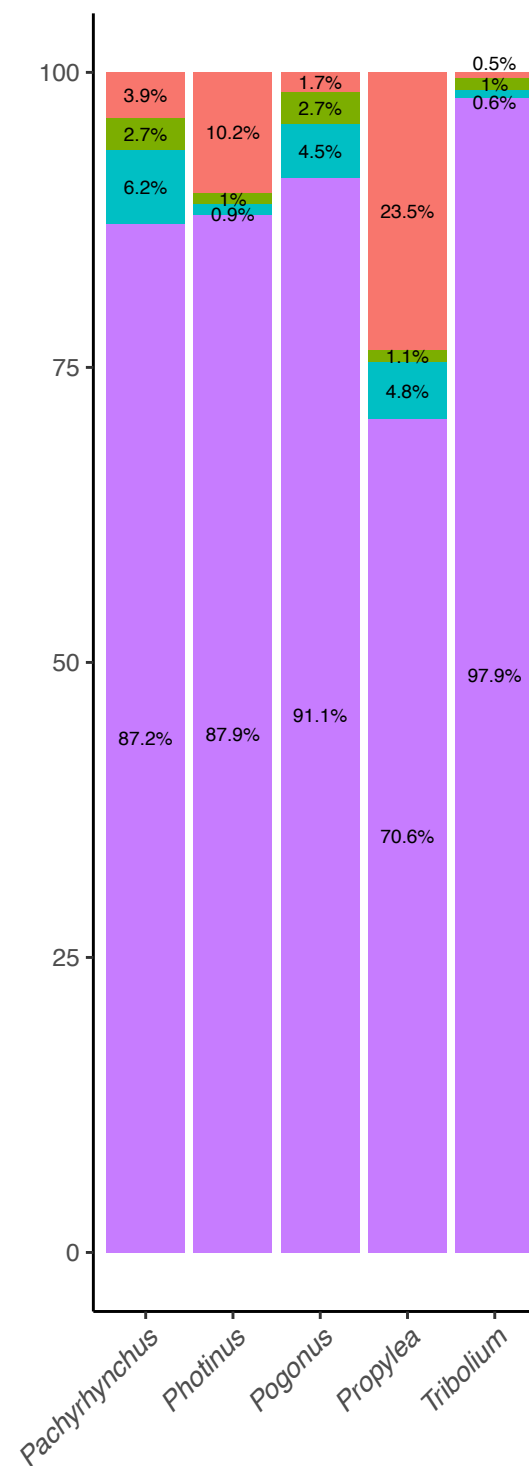

busco\_type

- D
- F
- M
- S

## Repeat Content

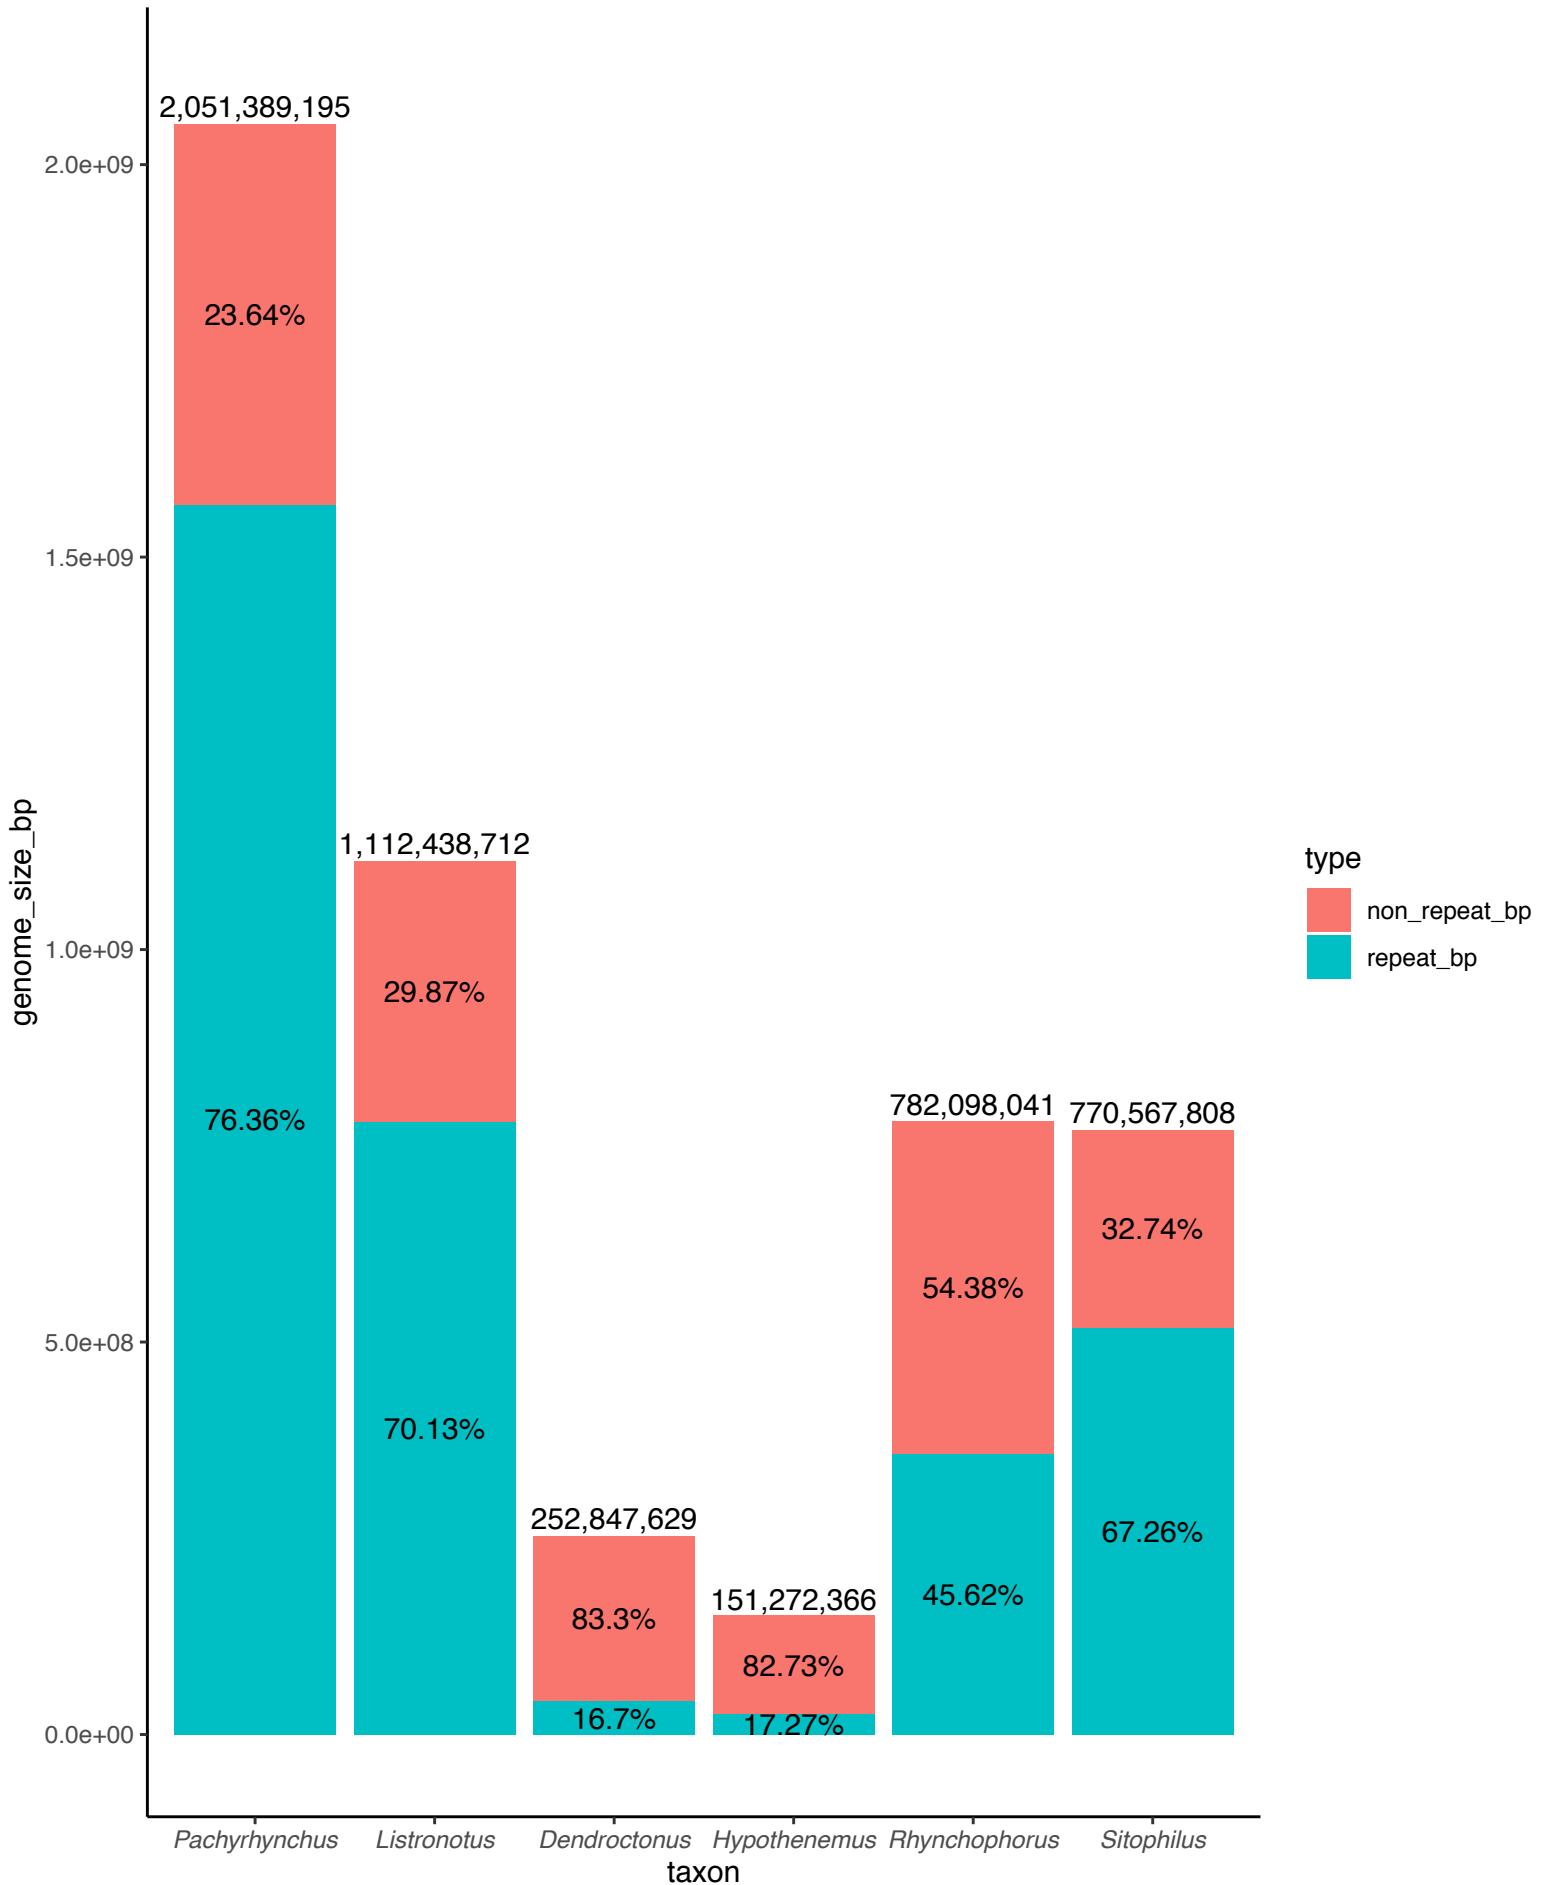

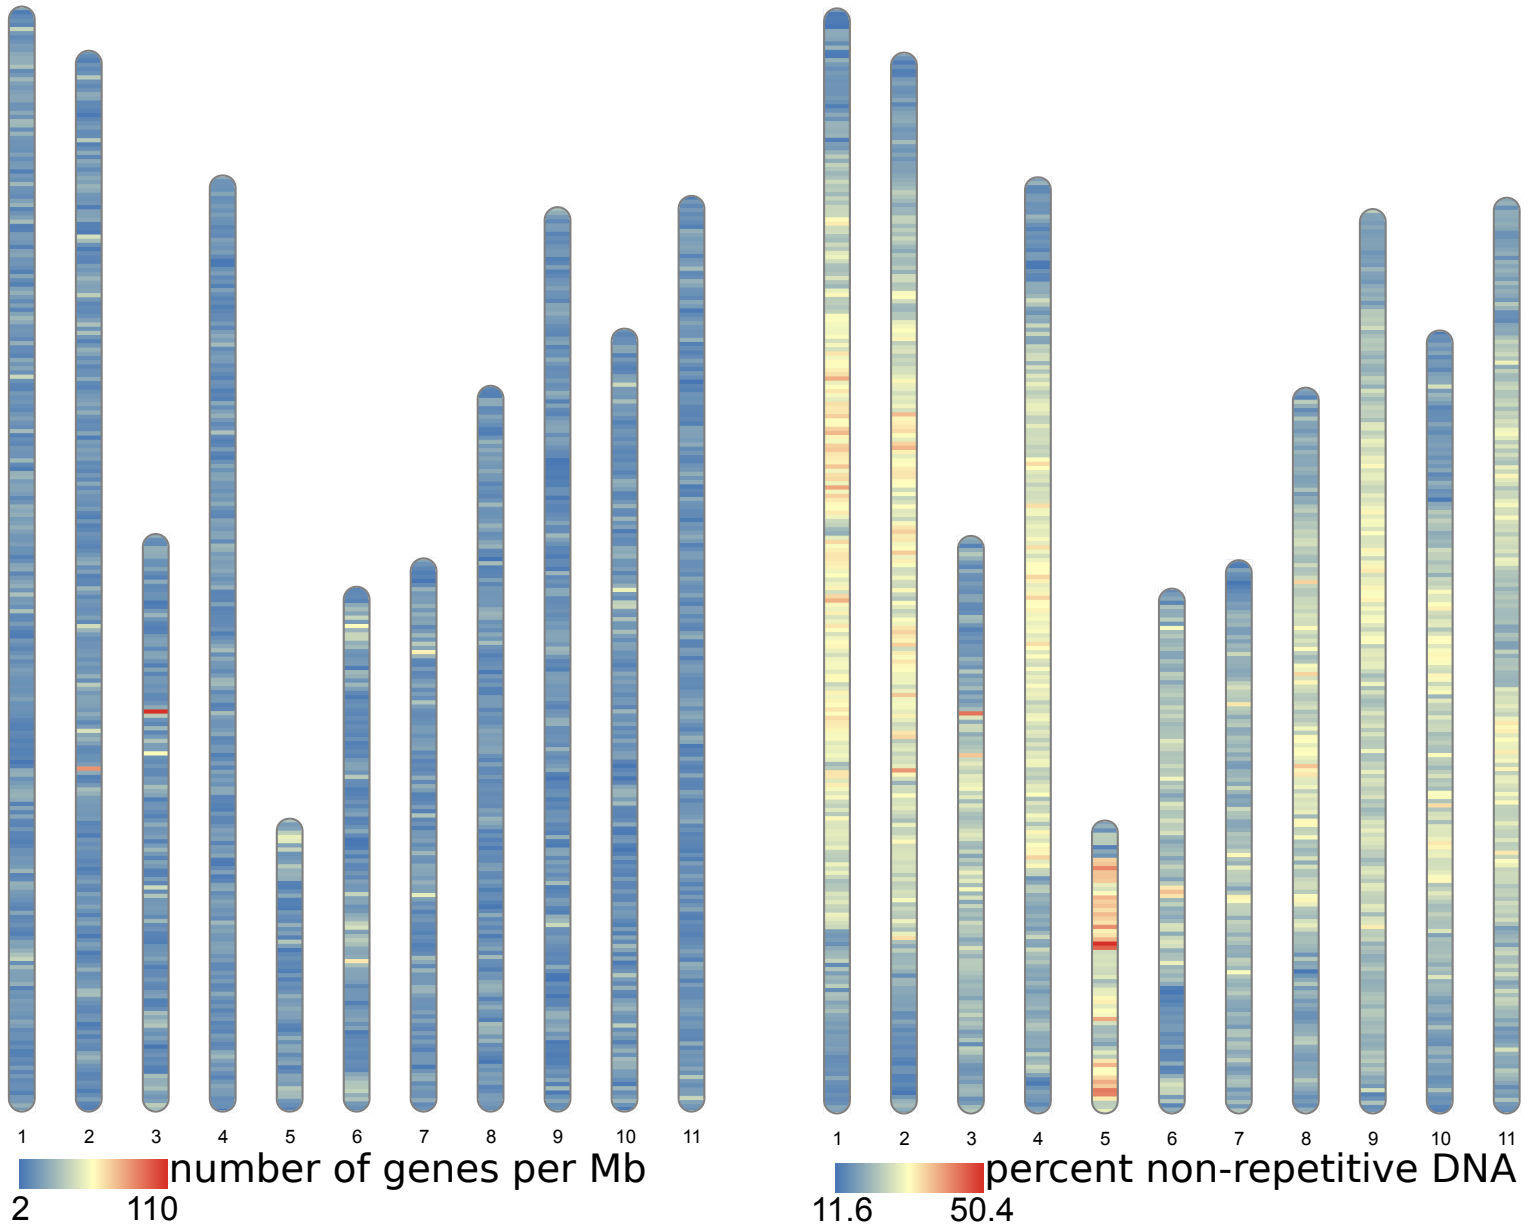

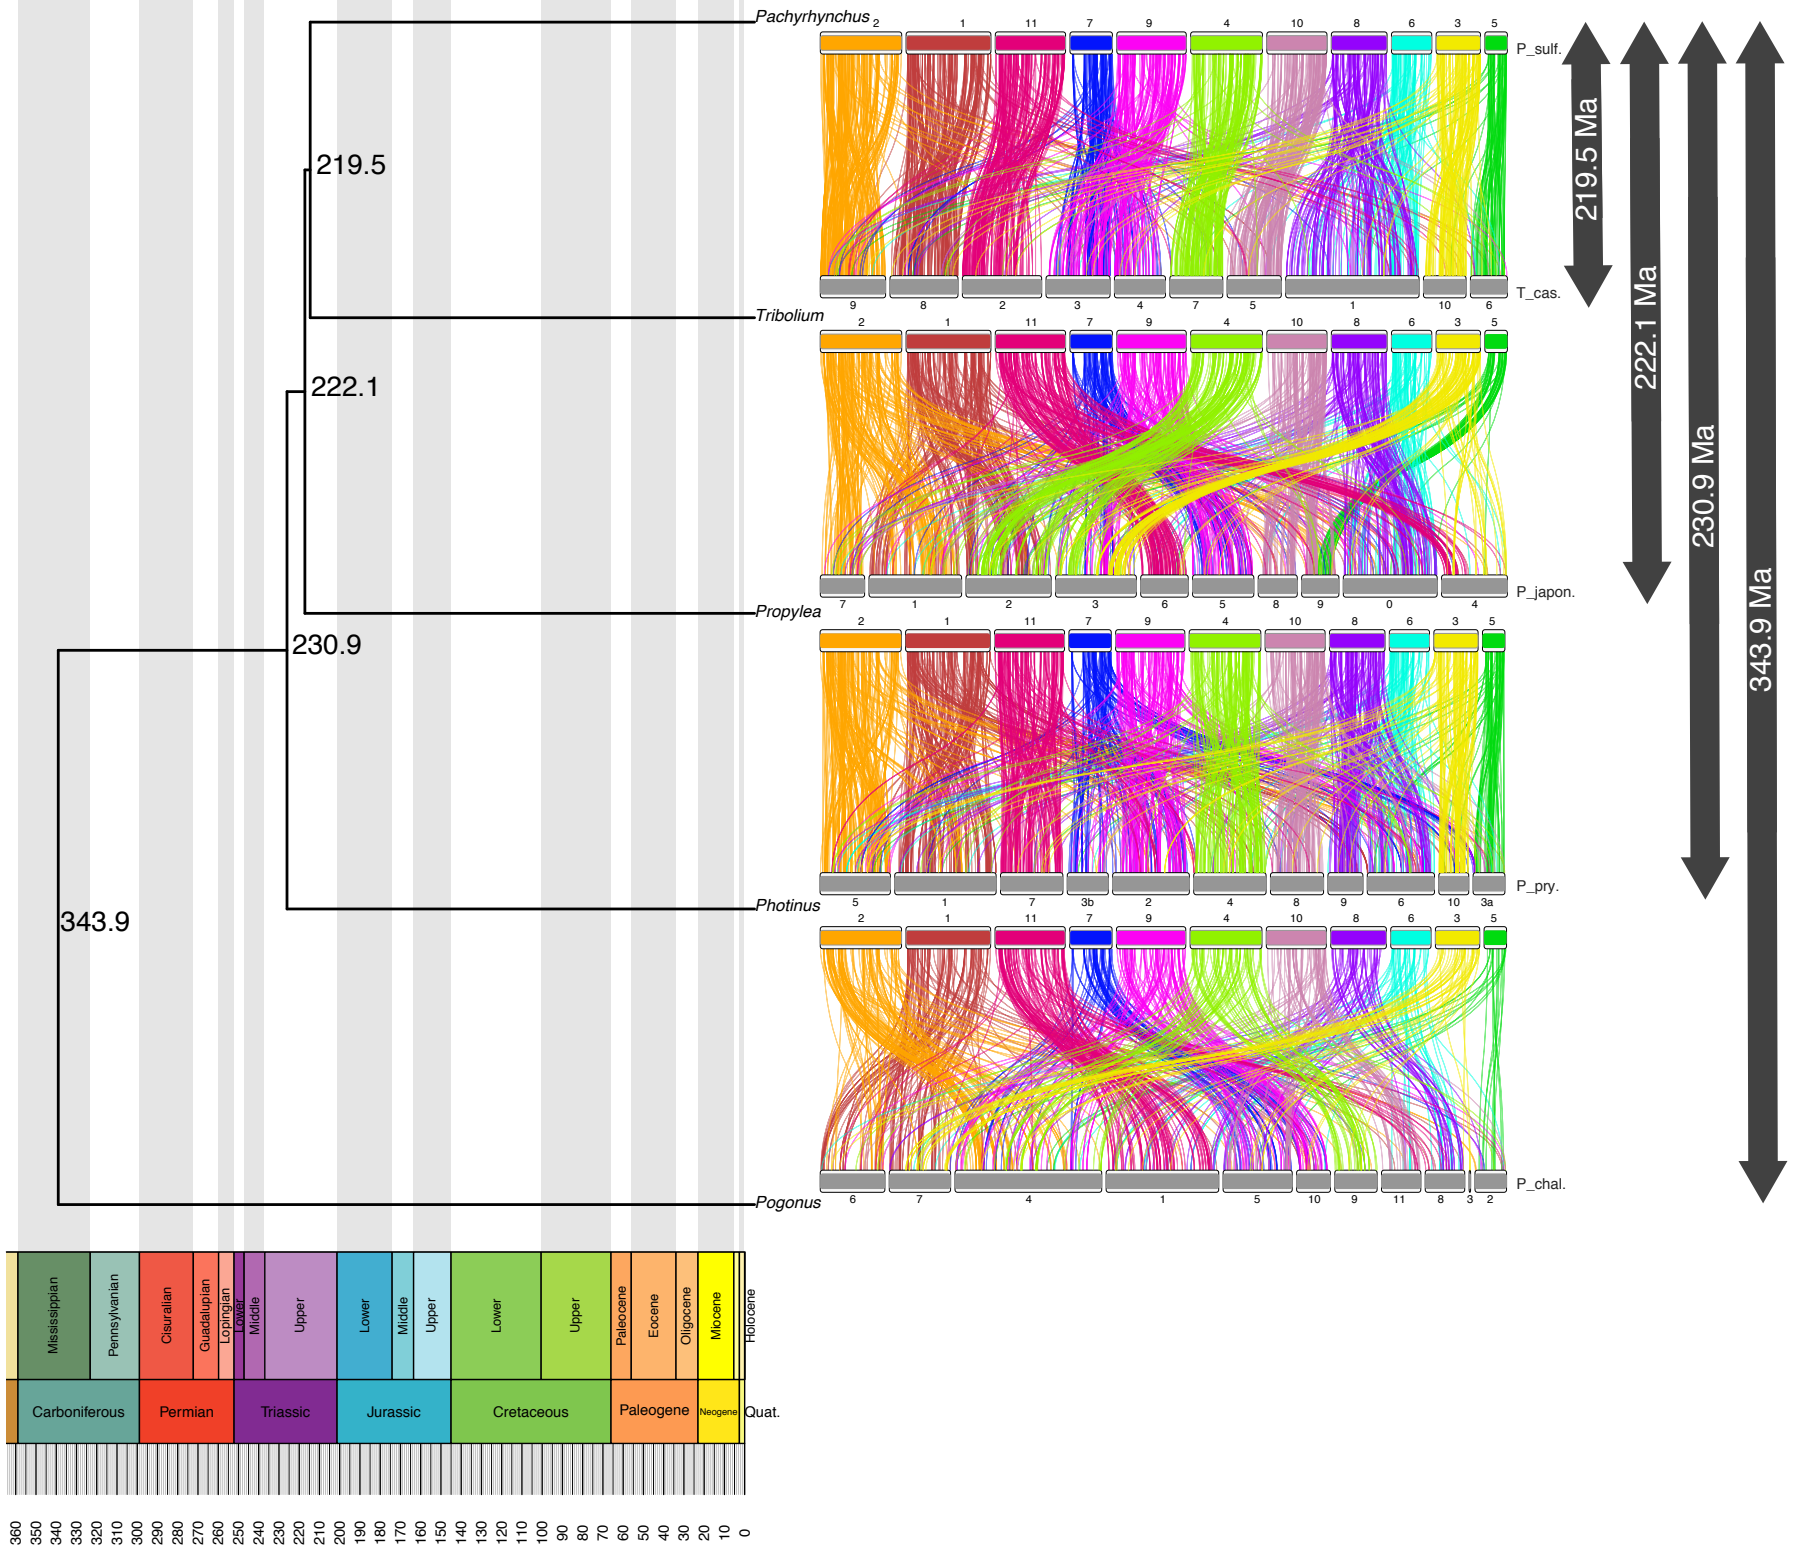





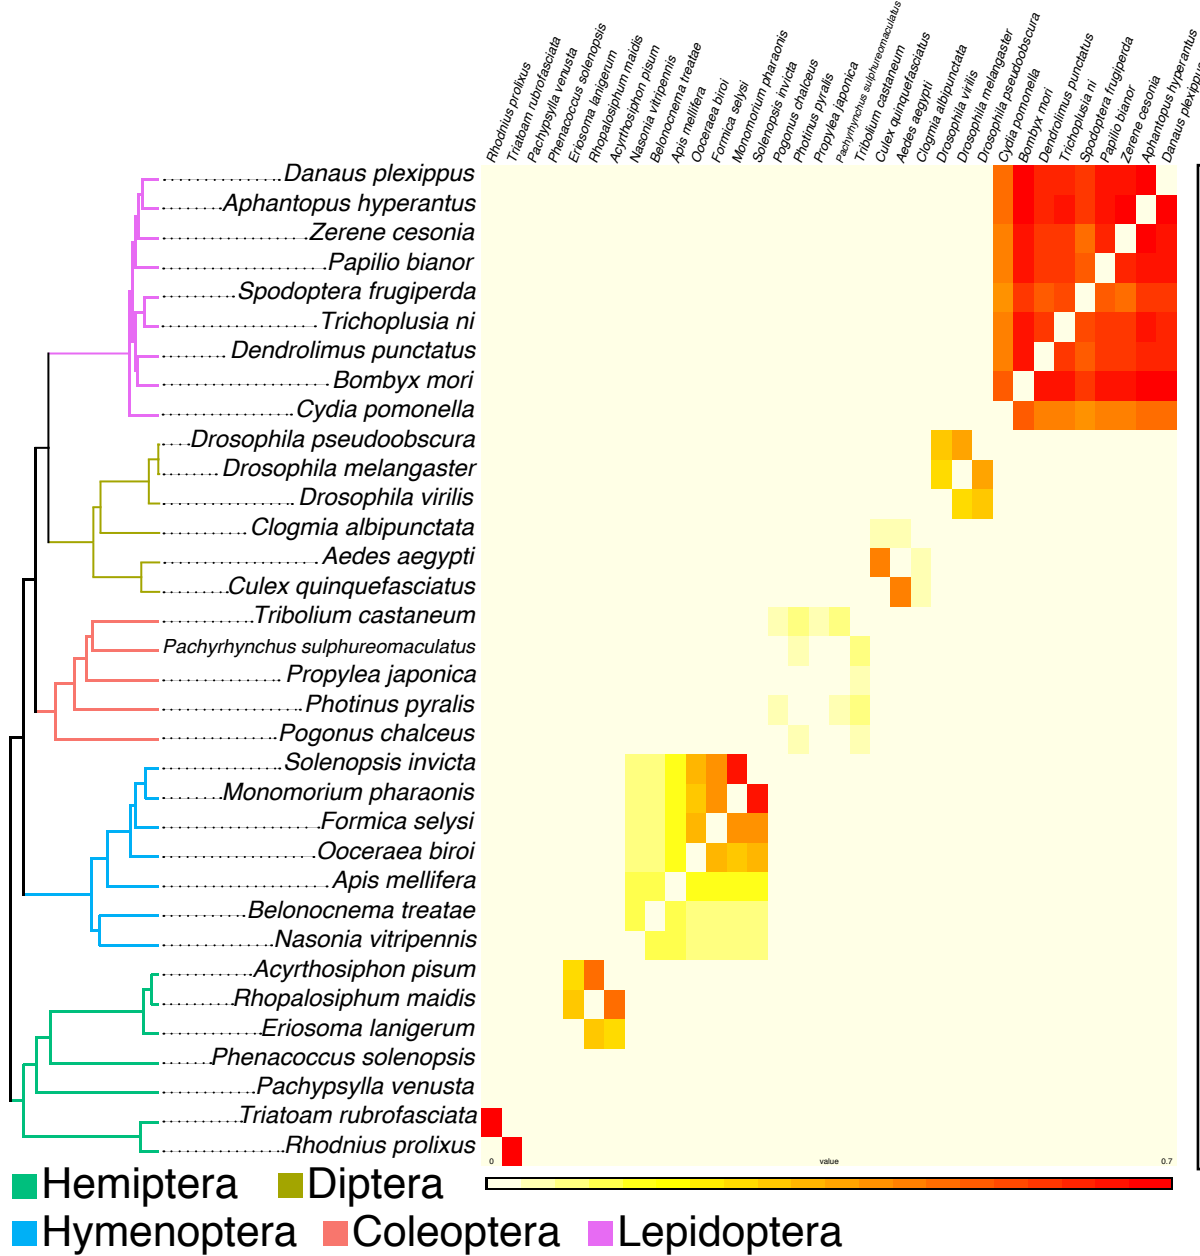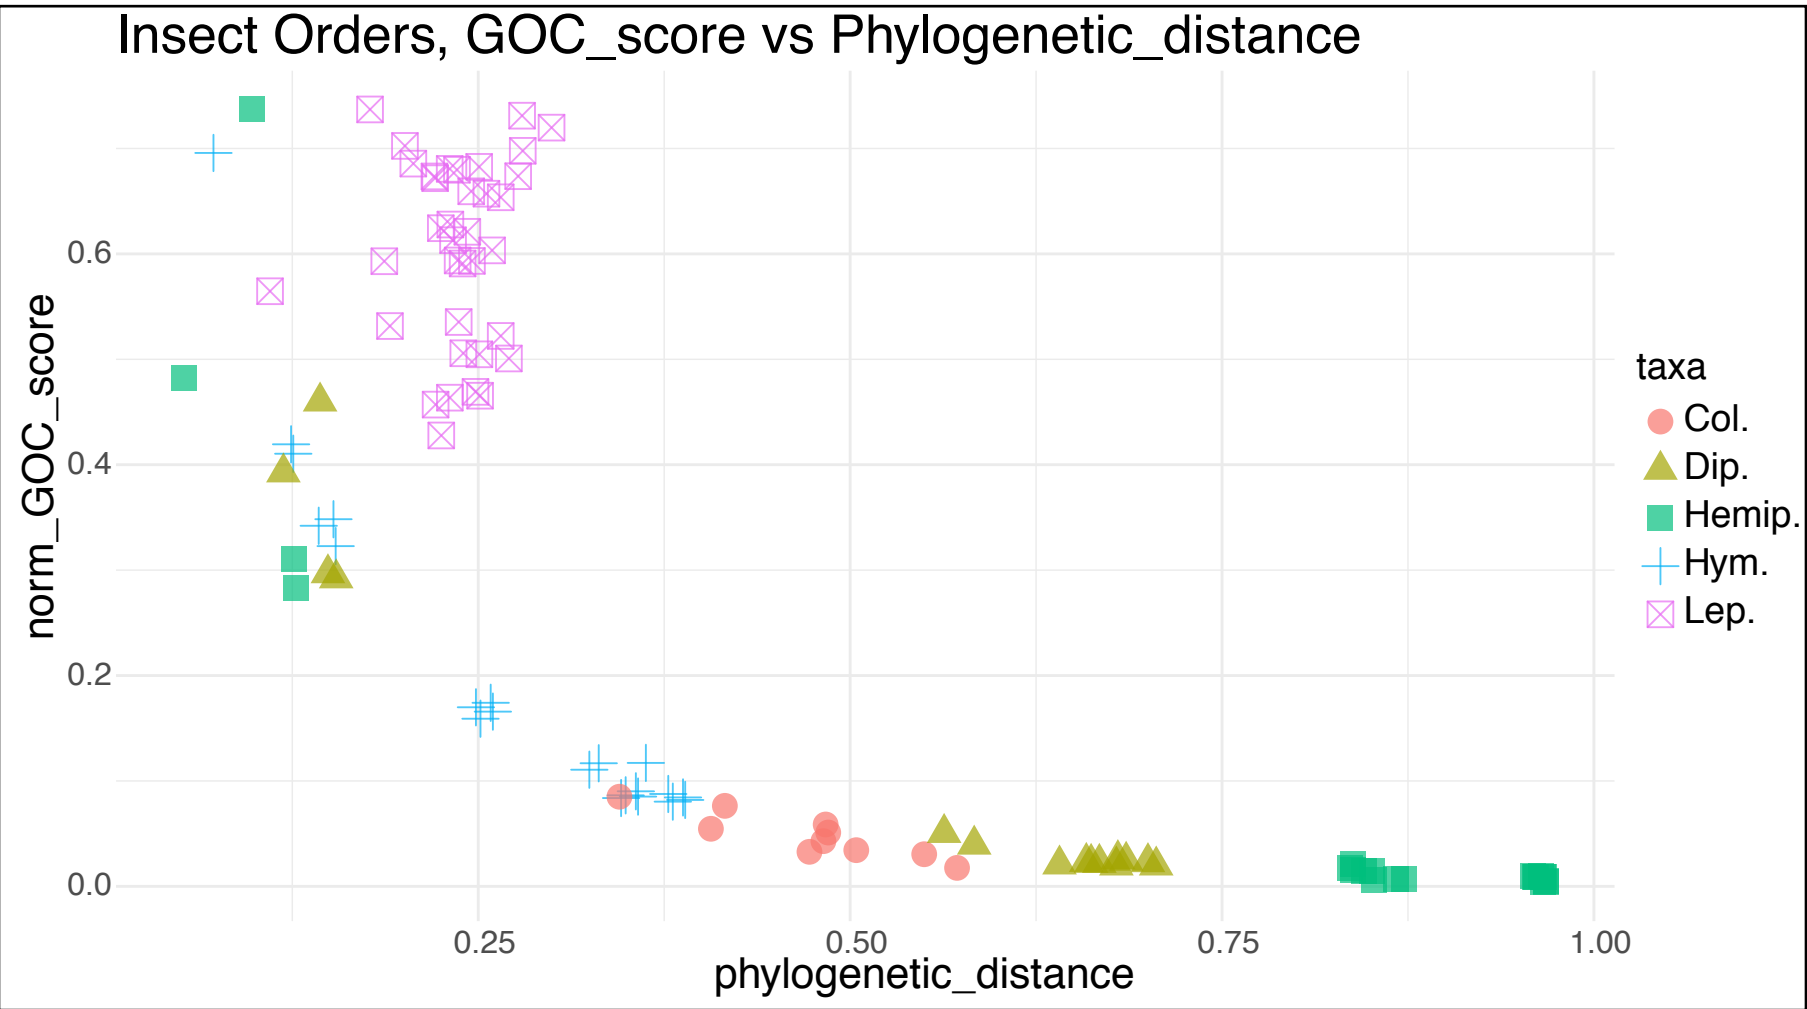

■ Hemiptera    ■ Diptera  
■ Hymenoptera    ■ Coleoptera    ■ Lepidoptera
